# Supplementary material for: Persistent Patient‐Level Effect of Guselkumab at Consecutive 8‐Week Dosing Visits and Over Time in Patients With Active Psoriatic Arthritis: Post Hoc Analysis of a 2‐Year, Phase 3, Randomized, Controlled Study
Source: PubMed Central journal article supplement — ACR Open Rheumatol. 2024 Oct 4;6(12):880–90. doi: 10.1002/acr2.11732 (PMC11638138; doi:10.1002/acr2.11732), 2024-10-04
Supplement: ACR2-6-880-s001.pdf [file ACR2-6-880-s001.pdf]

# ICMJE DISCLOSURE FORM

**Date:** 7/18/2024

**Your Name:** Enrique R Soriano

**Manuscript Title:** Persistent Patient-Level Effect of Guselkumab at Consecutive 8-Week Dosing Visits and Over Time in Patients with Active Psoriatic Arthritis: Post hoc Analysis of a 2-year, Phase 3 Randomized, Controlled Study

**Manuscript Number (if known):** ACROR-24-063.R1

In the interest of transparency, we ask you to disclose all relationships/activities/interests listed below that are related to the content of your manuscript. "Related" means any relation with for-profit or not-for-profit third parties whose interests may be affected by the content of the manuscript. Disclosure represents a commitment to transparency and does not necessarily indicate a bias. If you are in doubt about whether to list a relationship/activity/interest, it is preferable that you do so.

The author's relationships/activities/interests should be defined broadly. For example, if your manuscript pertains to the epidemiology of hypertension, you should declare all relationships with manufacturers of antihypertensive medication, even if that medication is not mentioned in the manuscript.

In item #1 below, report all support for the work reported in this manuscript without time limit. For all other items, the time frame for disclosure is the past 36 months.

|                                                                                                                                                                                            | Name all entities with whom you have this relationship or indicate none (add rows as needed)                                                                                                                                                                                                                                                                                                      | Specifications/Comments (e.g., if payments were made to you or to your institution) |  |         |  |          |  |                                                          |  |       |  |     |  |  |
|--------------------------------------------------------------------------------------------------------------------------------------------------------------------------------------------|---------------------------------------------------------------------------------------------------------------------------------------------------------------------------------------------------------------------------------------------------------------------------------------------------------------------------------------------------------------------------------------------------|-------------------------------------------------------------------------------------|--|---------|--|----------|--|----------------------------------------------------------|--|-------|--|-----|--|--|
| Time frame: Since the initial planning of the work                                                                                                                                         |                                                                                                                                                                                                                                                                                                                                                                                                   |                                                                                     |  |         |  |          |  |                                                          |  |       |  |     |  |  |
| <b>1</b><br>All support for the present manuscript (e.g., funding, provision of study materials, medical writing, article processing charges, etc.)<br><b>No time limit for this item.</b> | <input type="checkbox"/> <b>None</b><br><br><table border="1" style="width: 100%; border-collapse: collapse;"> <tr> <td style="width: 80%;">Janssen Research and Development, LLC.</td> <td style="width: 20%;"></td> </tr> <tr> <td> </td> <td> </td> </tr> <tr> <td> </td> <td> </td> </tr> </table>                                                                                            | Janssen Research and Development, LLC.                                              |  |         |  |          |  | <small>Click the tab key to add additional rows.</small> |  |       |  |     |  |  |
| Janssen Research and Development, LLC.                                                                                                                                                     |                                                                                                                                                                                                                                                                                                                                                                                                   |                                                                                     |  |         |  |          |  |                                                          |  |       |  |     |  |  |
|                                                                                                                                                                                            |                                                                                                                                                                                                                                                                                                                                                                                                   |                                                                                     |  |         |  |          |  |                                                          |  |       |  |     |  |  |
|                                                                                                                                                                                            |                                                                                                                                                                                                                                                                                                                                                                                                   |                                                                                     |  |         |  |          |  |                                                          |  |       |  |     |  |  |
| Time frame: past 36 months                                                                                                                                                                 |                                                                                                                                                                                                                                                                                                                                                                                                   |                                                                                     |  |         |  |          |  |                                                          |  |       |  |     |  |  |
| <b>2</b><br>Grants or contracts from any entity (if not indicated in item #1 above).                                                                                                       | <input type="checkbox"/> <b>None</b><br><br><table border="1" style="width: 100%; border-collapse: collapse;"> <tr> <td style="width: 80%;">AbbVie</td> <td style="width: 20%;"></td> </tr> <tr> <td>Janssen</td> <td> </td> </tr> <tr> <td>Novartis</td> <td> </td> </tr> <tr> <td>Pfizer</td> <td> </td> </tr> <tr> <td>Roche</td> <td> </td> </tr> <tr> <td>UCB</td> <td> </td> </tr> </table> | AbbVie                                                                              |  | Janssen |  | Novartis |  | Pfizer                                                   |  | Roche |  | UCB |  |  |
| AbbVie                                                                                                                                                                                     |                                                                                                                                                                                                                                                                                                                                                                                                   |                                                                                     |  |         |  |          |  |                                                          |  |       |  |     |  |  |
| Janssen                                                                                                                                                                                    |                                                                                                                                                                                                                                                                                                                                                                                                   |                                                                                     |  |         |  |          |  |                                                          |  |       |  |     |  |  |
| Novartis                                                                                                                                                                                   |                                                                                                                                                                                                                                                                                                                                                                                                   |                                                                                     |  |         |  |          |  |                                                          |  |       |  |     |  |  |
| Pfizer                                                                                                                                                                                     |                                                                                                                                                                                                                                                                                                                                                                                                   |                                                                                     |  |         |  |          |  |                                                          |  |       |  |     |  |  |
| Roche                                                                                                                                                                                      |                                                                                                                                                                                                                                                                                                                                                                                                   |                                                                                     |  |         |  |          |  |                                                          |  |       |  |     |  |  |
| UCB                                                                                                                                                                                        |                                                                                                                                                                                                                                                                                                                                                                                                   |                                                                                     |  |         |  |          |  |                                                          |  |       |  |     |  |  |

|                      |                                                                                                              | Name all entities with whom you have this relationship or indicate none (add rows as needed)                                                                                                                                                                                                                                                                                                                                                                                                                                                                                                                                                                                               | Specifications/Comments (e.g., if payments were made to you or to your institution) |  |         |  |                      |  |           |  |         |  |          |  |        |  |       |  |     |  |  |
|----------------------|--------------------------------------------------------------------------------------------------------------|--------------------------------------------------------------------------------------------------------------------------------------------------------------------------------------------------------------------------------------------------------------------------------------------------------------------------------------------------------------------------------------------------------------------------------------------------------------------------------------------------------------------------------------------------------------------------------------------------------------------------------------------------------------------------------------------|-------------------------------------------------------------------------------------|--|---------|--|----------------------|--|-----------|--|---------|--|----------|--|--------|--|-------|--|-----|--|--|
| 3                    | Royalties or licenses                                                                                        | <input checked="" type="checkbox"/> <b>None</b><br><table border="1" style="width: 100%; border-collapse: collapse;"> <tr><td style="width: 50%; height: 20px;"></td><td style="width: 50%;"></td></tr> <tr><td style="height: 20px;"></td><td></td></tr> <tr><td style="height: 20px;"></td><td></td></tr> </table>                                                                                                                                                                                                                                                                                                                                                                       |                                                                                     |  |         |  |                      |  |           |  |         |  |          |  |        |  |       |  |     |  |  |
|                      |                                                                                                              |                                                                                                                                                                                                                                                                                                                                                                                                                                                                                                                                                                                                                                                                                            |                                                                                     |  |         |  |                      |  |           |  |         |  |          |  |        |  |       |  |     |  |  |
|                      |                                                                                                              |                                                                                                                                                                                                                                                                                                                                                                                                                                                                                                                                                                                                                                                                                            |                                                                                     |  |         |  |                      |  |           |  |         |  |          |  |        |  |       |  |     |  |  |
|                      |                                                                                                              |                                                                                                                                                                                                                                                                                                                                                                                                                                                                                                                                                                                                                                                                                            |                                                                                     |  |         |  |                      |  |           |  |         |  |          |  |        |  |       |  |     |  |  |
| 4                    | Consulting fees                                                                                              | <input type="checkbox"/> <b>None</b><br><table border="1" style="width: 100%; border-collapse: collapse;"> <tr><td style="width: 50%; height: 20px;">AbbVie</td><td style="width: 50%;"></td></tr> <tr><td style="height: 20px;">Janssen</td><td></td></tr> <tr><td style="height: 20px;">Novartis</td><td></td></tr> <tr><td style="height: 20px;">Roche</td><td></td></tr> </table>                                                                                                                                                                                                                                                                                                      | AbbVie                                                                              |  | Janssen |  | Novartis             |  | Roche     |  |         |  |          |  |        |  |       |  |     |  |  |
| AbbVie               |                                                                                                              |                                                                                                                                                                                                                                                                                                                                                                                                                                                                                                                                                                                                                                                                                            |                                                                                     |  |         |  |                      |  |           |  |         |  |          |  |        |  |       |  |     |  |  |
| Janssen              |                                                                                                              |                                                                                                                                                                                                                                                                                                                                                                                                                                                                                                                                                                                                                                                                                            |                                                                                     |  |         |  |                      |  |           |  |         |  |          |  |        |  |       |  |     |  |  |
| Novartis             |                                                                                                              |                                                                                                                                                                                                                                                                                                                                                                                                                                                                                                                                                                                                                                                                                            |                                                                                     |  |         |  |                      |  |           |  |         |  |          |  |        |  |       |  |     |  |  |
| Roche                |                                                                                                              |                                                                                                                                                                                                                                                                                                                                                                                                                                                                                                                                                                                                                                                                                            |                                                                                     |  |         |  |                      |  |           |  |         |  |          |  |        |  |       |  |     |  |  |
| 5                    | Payment or honoraria for lectures, presentations, speakers bureaus, manuscript writing or educational events | <input type="checkbox"/> <b>None</b><br><table border="1" style="width: 100%; border-collapse: collapse;"> <tr><td style="width: 50%; height: 20px;">AbbVie</td><td style="width: 50%;"></td></tr> <tr><td style="height: 20px;">Amgen</td><td></td></tr> <tr><td style="height: 20px;">Bristol Myers Squibb</td><td></td></tr> <tr><td style="height: 20px;">Ely Lilly</td><td></td></tr> <tr><td style="height: 20px;">Janssen</td><td></td></tr> <tr><td style="height: 20px;">Novartis</td><td></td></tr> <tr><td style="height: 20px;">Pfizer</td><td></td></tr> <tr><td style="height: 20px;">Roche</td><td></td></tr> <tr><td style="height: 20px;">UCB</td><td></td></tr> </table> | AbbVie                                                                              |  | Amgen   |  | Bristol Myers Squibb |  | Ely Lilly |  | Janssen |  | Novartis |  | Pfizer |  | Roche |  | UCB |  |  |
| AbbVie               |                                                                                                              |                                                                                                                                                                                                                                                                                                                                                                                                                                                                                                                                                                                                                                                                                            |                                                                                     |  |         |  |                      |  |           |  |         |  |          |  |        |  |       |  |     |  |  |
| Amgen                |                                                                                                              |                                                                                                                                                                                                                                                                                                                                                                                                                                                                                                                                                                                                                                                                                            |                                                                                     |  |         |  |                      |  |           |  |         |  |          |  |        |  |       |  |     |  |  |
| Bristol Myers Squibb |                                                                                                              |                                                                                                                                                                                                                                                                                                                                                                                                                                                                                                                                                                                                                                                                                            |                                                                                     |  |         |  |                      |  |           |  |         |  |          |  |        |  |       |  |     |  |  |
| Ely Lilly            |                                                                                                              |                                                                                                                                                                                                                                                                                                                                                                                                                                                                                                                                                                                                                                                                                            |                                                                                     |  |         |  |                      |  |           |  |         |  |          |  |        |  |       |  |     |  |  |
| Janssen              |                                                                                                              |                                                                                                                                                                                                                                                                                                                                                                                                                                                                                                                                                                                                                                                                                            |                                                                                     |  |         |  |                      |  |           |  |         |  |          |  |        |  |       |  |     |  |  |
| Novartis             |                                                                                                              |                                                                                                                                                                                                                                                                                                                                                                                                                                                                                                                                                                                                                                                                                            |                                                                                     |  |         |  |                      |  |           |  |         |  |          |  |        |  |       |  |     |  |  |
| Pfizer               |                                                                                                              |                                                                                                                                                                                                                                                                                                                                                                                                                                                                                                                                                                                                                                                                                            |                                                                                     |  |         |  |                      |  |           |  |         |  |          |  |        |  |       |  |     |  |  |
| Roche                |                                                                                                              |                                                                                                                                                                                                                                                                                                                                                                                                                                                                                                                                                                                                                                                                                            |                                                                                     |  |         |  |                      |  |           |  |         |  |          |  |        |  |       |  |     |  |  |
| UCB                  |                                                                                                              |                                                                                                                                                                                                                                                                                                                                                                                                                                                                                                                                                                                                                                                                                            |                                                                                     |  |         |  |                      |  |           |  |         |  |          |  |        |  |       |  |     |  |  |
| 6                    | Payment for expert testimony                                                                                 | <input checked="" type="checkbox"/> <b>None</b><br><table border="1" style="width: 100%; border-collapse: collapse;"> <tr><td style="width: 50%; height: 20px;"></td><td style="width: 50%;"></td></tr> <tr><td style="height: 20px;"></td><td></td></tr> <tr><td style="height: 20px;"></td><td></td></tr> </table>                                                                                                                                                                                                                                                                                                                                                                       |                                                                                     |  |         |  |                      |  |           |  |         |  |          |  |        |  |       |  |     |  |  |
|                      |                                                                                                              |                                                                                                                                                                                                                                                                                                                                                                                                                                                                                                                                                                                                                                                                                            |                                                                                     |  |         |  |                      |  |           |  |         |  |          |  |        |  |       |  |     |  |  |
|                      |                                                                                                              |                                                                                                                                                                                                                                                                                                                                                                                                                                                                                                                                                                                                                                                                                            |                                                                                     |  |         |  |                      |  |           |  |         |  |          |  |        |  |       |  |     |  |  |
|                      |                                                                                                              |                                                                                                                                                                                                                                                                                                                                                                                                                                                                                                                                                                                                                                                                                            |                                                                                     |  |         |  |                      |  |           |  |         |  |          |  |        |  |       |  |     |  |  |
| 7                    | Support for attending meetings and/or travel                                                                 | <input checked="" type="checkbox"/> <b>None</b><br><table border="1" style="width: 100%; border-collapse: collapse;"> <tr><td style="width: 50%; height: 20px;"></td><td style="width: 50%;"></td></tr> <tr><td style="height: 20px;"></td><td></td></tr> <tr><td style="height: 20px;"></td><td></td></tr> </table>                                                                                                                                                                                                                                                                                                                                                                       |                                                                                     |  |         |  |                      |  |           |  |         |  |          |  |        |  |       |  |     |  |  |
|                      |                                                                                                              |                                                                                                                                                                                                                                                                                                                                                                                                                                                                                                                                                                                                                                                                                            |                                                                                     |  |         |  |                      |  |           |  |         |  |          |  |        |  |       |  |     |  |  |
|                      |                                                                                                              |                                                                                                                                                                                                                                                                                                                                                                                                                                                                                                                                                                                                                                                                                            |                                                                                     |  |         |  |                      |  |           |  |         |  |          |  |        |  |       |  |     |  |  |
|                      |                                                                                                              |                                                                                                                                                                                                                                                                                                                                                                                                                                                                                                                                                                                                                                                                                            |                                                                                     |  |         |  |                      |  |           |  |         |  |          |  |        |  |       |  |     |  |  |
| 8                    | Patents planned, issued or pending                                                                           | <input checked="" type="checkbox"/> <b>None</b><br><table border="1" style="width: 100%; border-collapse: collapse;"> <tr><td style="width: 50%; height: 20px;"></td><td style="width: 50%;"></td></tr> <tr><td style="height: 20px;"></td><td></td></tr> <tr><td style="height: 20px;"></td><td></td></tr> </table>                                                                                                                                                                                                                                                                                                                                                                       |                                                                                     |  |         |  |                      |  |           |  |         |  |          |  |        |  |       |  |     |  |  |
|                      |                                                                                                              |                                                                                                                                                                                                                                                                                                                                                                                                                                                                                                                                                                                                                                                                                            |                                                                                     |  |         |  |                      |  |           |  |         |  |          |  |        |  |       |  |     |  |  |
|                      |                                                                                                              |                                                                                                                                                                                                                                                                                                                                                                                                                                                                                                                                                                                                                                                                                            |                                                                                     |  |         |  |                      |  |           |  |         |  |          |  |        |  |       |  |     |  |  |
|                      |                                                                                                              |                                                                                                                                                                                                                                                                                                                                                                                                                                                                                                                                                                                                                                                                                            |                                                                                     |  |         |  |                      |  |           |  |         |  |          |  |        |  |       |  |     |  |  |
| 9                    | Participation on a Data Safety Monitoring Board or Advisory Board                                            | <input checked="" type="checkbox"/> <b>None</b><br><table border="1" style="width: 100%; border-collapse: collapse;"> <tr><td style="width: 50%; height: 20px;"></td><td style="width: 50%;"></td></tr> <tr><td style="height: 20px;"></td><td></td></tr> <tr><td style="height: 20px;"></td><td></td></tr> </table>                                                                                                                                                                                                                                                                                                                                                                       |                                                                                     |  |         |  |                      |  |           |  |         |  |          |  |        |  |       |  |     |  |  |
|                      |                                                                                                              |                                                                                                                                                                                                                                                                                                                                                                                                                                                                                                                                                                                                                                                                                            |                                                                                     |  |         |  |                      |  |           |  |         |  |          |  |        |  |       |  |     |  |  |
|                      |                                                                                                              |                                                                                                                                                                                                                                                                                                                                                                                                                                                                                                                                                                                                                                                                                            |                                                                                     |  |         |  |                      |  |           |  |         |  |          |  |        |  |       |  |     |  |  |
|                      |                                                                                                              |                                                                                                                                                                                                                                                                                                                                                                                                                                                                                                                                                                                                                                                                                            |                                                                                     |  |         |  |                      |  |           |  |         |  |          |  |        |  |       |  |     |  |  |
| 10                   | Leadership or fiduciary role in                                                                              | <input checked="" type="checkbox"/> <b>None</b>                                                                                                                                                                                                                                                                                                                                                                                                                                                                                                                                                                                                                                            |                                                                                     |  |         |  |                      |  |           |  |         |  |          |  |        |  |       |  |     |  |  |

|           |                                                                                  | Name all entities with whom you have this relationship or indicate none (add rows as needed)                                        | Specifications/Comments (e.g., if payments were made to you or to your institution) |
|-----------|----------------------------------------------------------------------------------|-------------------------------------------------------------------------------------------------------------------------------------|-------------------------------------------------------------------------------------|
|           | other board, society, committee or advocacy group, paid or unpaid                | <input type="checkbox"/><br><input type="checkbox"/><br><input type="checkbox"/>                                                    | <input type="checkbox"/><br><input type="checkbox"/><br><input type="checkbox"/>    |
| <b>11</b> | Stock or stock options                                                           | <input checked="" type="checkbox"/> <b>None</b><br><input type="checkbox"/><br><input type="checkbox"/><br><input type="checkbox"/> | <input type="checkbox"/><br><input type="checkbox"/><br><input type="checkbox"/>    |
| <b>12</b> | Receipt of equipment, materials, drugs, medical writing, gifts or other services | <input checked="" type="checkbox"/> <b>None</b><br><input type="checkbox"/><br><input type="checkbox"/><br><input type="checkbox"/> | <input type="checkbox"/><br><input type="checkbox"/><br><input type="checkbox"/>    |
| <b>13</b> | Other financial or non-financial interests                                       | <input checked="" type="checkbox"/> <b>None</b><br><input type="checkbox"/><br><input type="checkbox"/><br><input type="checkbox"/> | <input type="checkbox"/><br><input type="checkbox"/><br><input type="checkbox"/>    |

Please place an "X" next to the following statement to indicate your agreement:

I certify that I have answered every question and have not altered the wording of any of the questions on this form.

## ICMJE DISCLOSURE FORM

**Date:** 7/18/2024

**Your Name:** Nathalie J Shiff

**Manuscript Title:** Persistent Patient-Level Effect of Guselkumab at Consecutive 8-Week Dosing Visits and Over Time in Patients with Active Psoriatic Arthritis: Post hoc Analysis of a 2-year, Phase 3 Randomized, Controlled Study

**Manuscript Number (if known):** ACROR-24-063.R1

In the interest of transparency, we ask you to disclose all relationships/activities/interests listed below that are related to the content of your manuscript. "Related" means any relation with for-profit or not-for-profit third parties whose interests may be affected by the content of the manuscript. Disclosure represents a commitment to transparency and does not necessarily indicate a bias. If you are in doubt about whether to list a relationship/activity/interest, it is preferable that you do so.

The author's relationships/activities/interests should be defined broadly. For example, if your manuscript pertains to the epidemiology of hypertension, you should declare all relationships with manufacturers of antihypertensive medication, even if that medication is not mentioned in the manuscript.

In item #1 below, report all support for the work reported in this manuscript without time limit. For all other items, the time frame for disclosure is the past 36 months.

|                                                    | Name all entities with whom you have this relationship or indicate none (add rows as needed)                                                                                   | Specifications/Comments (e.g., if payments were made to you or to your institution)                                                                                                                                                                                                                                                                                                                              |                                               |  |  |  |  |                                           |
|----------------------------------------------------|--------------------------------------------------------------------------------------------------------------------------------------------------------------------------------|------------------------------------------------------------------------------------------------------------------------------------------------------------------------------------------------------------------------------------------------------------------------------------------------------------------------------------------------------------------------------------------------------------------|-----------------------------------------------|--|--|--|--|-------------------------------------------|
| Time frame: Since the initial planning of the work |                                                                                                                                                                                |                                                                                                                                                                                                                                                                                                                                                                                                                  |                                               |  |  |  |  |                                           |
| <b>1</b>                                           | All support for the present manuscript (e.g., funding, provision of study materials, medical writing, article processing charges, etc.)<br><b>No time limit for this item.</b> | <input type="checkbox"/> <b>None</b><br><table border="1" style="width: 100%; border-collapse: collapse; margin-top: 5px;"> <tr> <td style="width: 60%;"><u>Janssen Research and Development, LLC.</u></td> <td style="width: 40%;"></td> </tr> <tr> <td> </td> <td> </td> </tr> <tr> <td> </td> <td style="text-align: center; font-size: small;">Click the tab key to add additional rows.</td> </tr> </table> | <u>Janssen Research and Development, LLC.</u> |  |  |  |  | Click the tab key to add additional rows. |
| <u>Janssen Research and Development, LLC.</u>      |                                                                                                                                                                                |                                                                                                                                                                                                                                                                                                                                                                                                                  |                                               |  |  |  |  |                                           |
|                                                    |                                                                                                                                                                                |                                                                                                                                                                                                                                                                                                                                                                                                                  |                                               |  |  |  |  |                                           |
|                                                    | Click the tab key to add additional rows.                                                                                                                                      |                                                                                                                                                                                                                                                                                                                                                                                                                  |                                               |  |  |  |  |                                           |
| Time frame: past 36 months                         |                                                                                                                                                                                |                                                                                                                                                                                                                                                                                                                                                                                                                  |                                               |  |  |  |  |                                           |
| <b>2</b>                                           | Grants or contracts from any entity (if not indicated in item #1 above).                                                                                                       | <input checked="" type="checkbox"/> <b>None</b><br><table border="1" style="width: 100%; border-collapse: collapse; margin-top: 5px;"> <tr> <td style="width: 60%;"></td> <td style="width: 40%;"></td> </tr> <tr> <td> </td> <td> </td> </tr> <tr> <td> </td> <td> </td> </tr> </table>                                                                                                                         |                                               |  |  |  |  |                                           |
|                                                    |                                                                                                                                                                                |                                                                                                                                                                                                                                                                                                                                                                                                                  |                                               |  |  |  |  |                                           |
|                                                    |                                                                                                                                                                                |                                                                                                                                                                                                                                                                                                                                                                                                                  |                                               |  |  |  |  |                                           |
|                                                    |                                                                                                                                                                                |                                                                                                                                                                                                                                                                                                                                                                                                                  |                                               |  |  |  |  |                                           |
| <b>3</b>                                           | Royalties or licenses                                                                                                                                                          | <input checked="" type="checkbox"/> <b>None</b><br><table border="1" style="width: 100%; border-collapse: collapse; margin-top: 5px;"> <tr> <td style="width: 60%;"></td> <td style="width: 40%;"></td> </tr> <tr> <td> </td> <td> </td> </tr> <tr> <td> </td> <td> </td> </tr> </table>                                                                                                                         |                                               |  |  |  |  |                                           |
|                                                    |                                                                                                                                                                                |                                                                                                                                                                                                                                                                                                                                                                                                                  |                                               |  |  |  |  |                                           |
|                                                    |                                                                                                                                                                                |                                                                                                                                                                                                                                                                                                                                                                                                                  |                                               |  |  |  |  |                                           |
|                                                    |                                                                                                                                                                                |                                                                                                                                                                                                                                                                                                                                                                                                                  |                                               |  |  |  |  |                                           |

|    |                                                                                                              | Name all entities with whom you have this relationship or indicate none (add rows as needed)                                                                                                                                                                                                                                                                           | Specifications/Comments (e.g., if payments were made to you or to your institution) |  |  |  |  |  |  |  |  |
|----|--------------------------------------------------------------------------------------------------------------|------------------------------------------------------------------------------------------------------------------------------------------------------------------------------------------------------------------------------------------------------------------------------------------------------------------------------------------------------------------------|-------------------------------------------------------------------------------------|--|--|--|--|--|--|--|--|
| 4  | Consulting fees                                                                                              | <input checked="" type="checkbox"/> <b>None</b><br><table border="1" style="width: 100%; border-collapse: collapse;"> <tr><td style="width: 50%; height: 15px;"></td><td style="width: 50%;"></td></tr> <tr><td style="height: 15px;"></td><td></td></tr> <tr><td style="height: 15px;"></td><td></td></tr> <tr><td style="height: 15px;"></td><td></td></tr> </table> |                                                                                     |  |  |  |  |  |  |  |  |
|    |                                                                                                              |                                                                                                                                                                                                                                                                                                                                                                        |                                                                                     |  |  |  |  |  |  |  |  |
|    |                                                                                                              |                                                                                                                                                                                                                                                                                                                                                                        |                                                                                     |  |  |  |  |  |  |  |  |
|    |                                                                                                              |                                                                                                                                                                                                                                                                                                                                                                        |                                                                                     |  |  |  |  |  |  |  |  |
|    |                                                                                                              |                                                                                                                                                                                                                                                                                                                                                                        |                                                                                     |  |  |  |  |  |  |  |  |
| 5  | Payment or honoraria for lectures, presentations, speakers bureaus, manuscript writing or educational events | <input checked="" type="checkbox"/> <b>None</b><br><table border="1" style="width: 100%; border-collapse: collapse;"> <tr><td style="width: 50%; height: 15px;"></td><td style="width: 50%;"></td></tr> <tr><td style="height: 15px;"></td><td></td></tr> <tr><td style="height: 15px;"></td><td></td></tr> </table>                                                   |                                                                                     |  |  |  |  |  |  |  |  |
|    |                                                                                                              |                                                                                                                                                                                                                                                                                                                                                                        |                                                                                     |  |  |  |  |  |  |  |  |
|    |                                                                                                              |                                                                                                                                                                                                                                                                                                                                                                        |                                                                                     |  |  |  |  |  |  |  |  |
|    |                                                                                                              |                                                                                                                                                                                                                                                                                                                                                                        |                                                                                     |  |  |  |  |  |  |  |  |
| 6  | Payment for expert testimony                                                                                 | <input checked="" type="checkbox"/> <b>None</b><br><table border="1" style="width: 100%; border-collapse: collapse;"> <tr><td style="width: 50%; height: 15px;"></td><td style="width: 50%;"></td></tr> <tr><td style="height: 15px;"></td><td></td></tr> <tr><td style="height: 15px;"></td><td></td></tr> </table>                                                   |                                                                                     |  |  |  |  |  |  |  |  |
|    |                                                                                                              |                                                                                                                                                                                                                                                                                                                                                                        |                                                                                     |  |  |  |  |  |  |  |  |
|    |                                                                                                              |                                                                                                                                                                                                                                                                                                                                                                        |                                                                                     |  |  |  |  |  |  |  |  |
|    |                                                                                                              |                                                                                                                                                                                                                                                                                                                                                                        |                                                                                     |  |  |  |  |  |  |  |  |
| 7  | Support for attending meetings and/or travel                                                                 | <input checked="" type="checkbox"/> <b>None</b><br><table border="1" style="width: 100%; border-collapse: collapse;"> <tr><td style="width: 50%; height: 15px;"></td><td style="width: 50%;"></td></tr> <tr><td style="height: 15px;"></td><td></td></tr> <tr><td style="height: 15px;"></td><td></td></tr> </table>                                                   |                                                                                     |  |  |  |  |  |  |  |  |
|    |                                                                                                              |                                                                                                                                                                                                                                                                                                                                                                        |                                                                                     |  |  |  |  |  |  |  |  |
|    |                                                                                                              |                                                                                                                                                                                                                                                                                                                                                                        |                                                                                     |  |  |  |  |  |  |  |  |
|    |                                                                                                              |                                                                                                                                                                                                                                                                                                                                                                        |                                                                                     |  |  |  |  |  |  |  |  |
| 8  | Patents planned, issued or pending                                                                           | <input checked="" type="checkbox"/> <b>None</b><br><table border="1" style="width: 100%; border-collapse: collapse;"> <tr><td style="width: 50%; height: 15px;"></td><td style="width: 50%;"></td></tr> <tr><td style="height: 15px;"></td><td></td></tr> <tr><td style="height: 15px;"></td><td></td></tr> </table>                                                   |                                                                                     |  |  |  |  |  |  |  |  |
|    |                                                                                                              |                                                                                                                                                                                                                                                                                                                                                                        |                                                                                     |  |  |  |  |  |  |  |  |
|    |                                                                                                              |                                                                                                                                                                                                                                                                                                                                                                        |                                                                                     |  |  |  |  |  |  |  |  |
|    |                                                                                                              |                                                                                                                                                                                                                                                                                                                                                                        |                                                                                     |  |  |  |  |  |  |  |  |
| 9  | Participation on a Data Safety Monitoring Board or Advisory Board                                            | <input checked="" type="checkbox"/> <b>None</b><br><table border="1" style="width: 100%; border-collapse: collapse;"> <tr><td style="width: 50%; height: 15px;"></td><td style="width: 50%;"></td></tr> <tr><td style="height: 15px;"></td><td></td></tr> <tr><td style="height: 15px;"></td><td></td></tr> </table>                                                   |                                                                                     |  |  |  |  |  |  |  |  |
|    |                                                                                                              |                                                                                                                                                                                                                                                                                                                                                                        |                                                                                     |  |  |  |  |  |  |  |  |
|    |                                                                                                              |                                                                                                                                                                                                                                                                                                                                                                        |                                                                                     |  |  |  |  |  |  |  |  |
|    |                                                                                                              |                                                                                                                                                                                                                                                                                                                                                                        |                                                                                     |  |  |  |  |  |  |  |  |
| 10 | Leadership or fiduciary role in other board, society, committee or advocacy group, paid or unpaid            | <input checked="" type="checkbox"/> <b>None</b><br><table border="1" style="width: 100%; border-collapse: collapse;"> <tr><td style="width: 50%; height: 15px;"></td><td style="width: 50%;"></td></tr> <tr><td style="height: 15px;"></td><td></td></tr> <tr><td style="height: 15px;"></td><td></td></tr> </table>                                                   |                                                                                     |  |  |  |  |  |  |  |  |
|    |                                                                                                              |                                                                                                                                                                                                                                                                                                                                                                        |                                                                                     |  |  |  |  |  |  |  |  |
|    |                                                                                                              |                                                                                                                                                                                                                                                                                                                                                                        |                                                                                     |  |  |  |  |  |  |  |  |
|    |                                                                                                              |                                                                                                                                                                                                                                                                                                                                                                        |                                                                                     |  |  |  |  |  |  |  |  |

|    |                                                                                  | Name all entities with whom you have this relationship or indicate none (add rows as needed) | Specifications/Comments (e.g., if payments were made to you or to your institution) |
|----|----------------------------------------------------------------------------------|----------------------------------------------------------------------------------------------|-------------------------------------------------------------------------------------|
| 11 | Stock or stock options                                                           | <input type="checkbox"/> None                                                                |                                                                                     |
|    |                                                                                  | AbbVie                                                                                       | Current stock ownership dated 24May2024                                             |
|    |                                                                                  | Gilead                                                                                       | Current stock ownership dated 24May2024                                             |
|    |                                                                                  | Iovance                                                                                      | Current stock ownership dated 24May2024                                             |
|    |                                                                                  | Jazz                                                                                         | Current stock ownership dated 24May2024                                             |
|    |                                                                                  | Johnson & Johnson                                                                            | Current stock ownership dated 24May2024                                             |
|    |                                                                                  | Novavax                                                                                      | Current stock ownership dated 24May2024                                             |
|    |                                                                                  | Viatrix                                                                                      | Current stock ownership dated 24May2024                                             |
|    |                                                                                  | Novo-Nordisk                                                                                 | Owns or has owned in the past 3 years                                               |
|    | Pfizer                                                                           | Owns or has owned in the past 3 years                                                        |                                                                                     |
| 12 | Receipt of equipment, materials, drugs, medical writing, gifts or other services | <input checked="" type="checkbox"/> None                                                     |                                                                                     |
|    |                                                                                  |                                                                                              |                                                                                     |
|    |                                                                                  |                                                                                              |                                                                                     |
|    |                                                                                  |                                                                                              |                                                                                     |
| 13 | Other financial or non-financial interests                                       | <input checked="" type="checkbox"/> None                                                     |                                                                                     |
|    |                                                                                  |                                                                                              |                                                                                     |
|    |                                                                                  |                                                                                              |                                                                                     |
|    |                                                                                  |                                                                                              |                                                                                     |

Please place an "X" next to the following statement to indicate your agreement:

I certify that I have answered every question and have not altered the wording of any of the questions on this form.

## ICMJE DISCLOSURE FORM

**Date:** 7/18/2024

**Your Name:** May Shawi

**Manuscript Title:** Persistent Patient-Level Effect of Guselkumab at Consecutive 8-Week Dosing Visits and Over Time in Patients with Active Psoriatic Arthritis: Post hoc Analysis of a 2-year, Phase 3 Randomized, Controlled Study

**Manuscript Number (if known):** ACROR-24-063.R1

In the interest of transparency, we ask you to disclose all relationships/activities/interests listed below that are related to the content of your manuscript. "Related" means any relation with for-profit or not-for-profit third parties whose interests may be affected by the content of the manuscript. Disclosure represents a commitment to transparency and does not necessarily indicate a bias. If you are in doubt about whether to list a relationship/activity/interest, it is preferable that you do so.

The author's relationships/activities/interests should be defined broadly. For example, if your manuscript pertains to the epidemiology of hypertension, you should declare all relationships with manufacturers of antihypertensive medication, even if that medication is not mentioned in the manuscript.

In item #1 below, report all support for the work reported in this manuscript without time limit. For all other items, the time frame for disclosure is the past 36 months.

|                                                           | Name all entities with whom you have this relationship or indicate none (add rows as needed)                                                                                   | Specifications/Comments (e.g., if payments were made to you or to your institution)                                                                                                                                                                                                                                                                                                                                                                                                  |                                        |  |  |  |  |  |
|-----------------------------------------------------------|--------------------------------------------------------------------------------------------------------------------------------------------------------------------------------|--------------------------------------------------------------------------------------------------------------------------------------------------------------------------------------------------------------------------------------------------------------------------------------------------------------------------------------------------------------------------------------------------------------------------------------------------------------------------------------|----------------------------------------|--|--|--|--|--|
| <b>Time frame: Since the initial planning of the work</b> |                                                                                                                                                                                |                                                                                                                                                                                                                                                                                                                                                                                                                                                                                      |                                        |  |  |  |  |  |
| <b>1</b>                                                  | All support for the present manuscript (e.g., funding, provision of study materials, medical writing, article processing charges, etc.)<br><b>No time limit for this item.</b> | <input type="checkbox"/> <b>None</b><br><table border="1" style="width: 100%; border-collapse: collapse; margin-top: 5px;"> <tr> <td style="width: 80%; padding: 2px;">Janssen Research and Development, LLC.</td> <td style="width: 20%;"></td> </tr> <tr> <td style="padding: 2px;"> </td> <td></td> </tr> <tr> <td style="padding: 2px;"> </td> <td></td> </tr> </table> <p style="font-size: small; color: gray; margin-top: 5px;">Click the tab key to add additional rows.</p> | Janssen Research and Development, LLC. |  |  |  |  |  |
| Janssen Research and Development, LLC.                    |                                                                                                                                                                                |                                                                                                                                                                                                                                                                                                                                                                                                                                                                                      |                                        |  |  |  |  |  |
|                                                           |                                                                                                                                                                                |                                                                                                                                                                                                                                                                                                                                                                                                                                                                                      |                                        |  |  |  |  |  |
|                                                           |                                                                                                                                                                                |                                                                                                                                                                                                                                                                                                                                                                                                                                                                                      |                                        |  |  |  |  |  |
| <b>Time frame: past 36 months</b>                         |                                                                                                                                                                                |                                                                                                                                                                                                                                                                                                                                                                                                                                                                                      |                                        |  |  |  |  |  |
| <b>2</b>                                                  | Grants or contracts from any entity (if not indicated in item #1 above).                                                                                                       | <input checked="" type="checkbox"/> <b>None</b><br><table border="1" style="width: 100%; border-collapse: collapse; margin-top: 5px;"> <tr> <td style="width: 80%; padding: 2px;"> </td> <td style="width: 20%;"></td> </tr> <tr> <td style="padding: 2px;"> </td> <td></td> </tr> <tr> <td style="padding: 2px;"> </td> <td></td> </tr> </table>                                                                                                                                    |                                        |  |  |  |  |  |
|                                                           |                                                                                                                                                                                |                                                                                                                                                                                                                                                                                                                                                                                                                                                                                      |                                        |  |  |  |  |  |
|                                                           |                                                                                                                                                                                |                                                                                                                                                                                                                                                                                                                                                                                                                                                                                      |                                        |  |  |  |  |  |
|                                                           |                                                                                                                                                                                |                                                                                                                                                                                                                                                                                                                                                                                                                                                                                      |                                        |  |  |  |  |  |
| <b>3</b>                                                  | Royalties or licenses                                                                                                                                                          | <input checked="" type="checkbox"/> <b>None</b><br><table border="1" style="width: 100%; border-collapse: collapse; margin-top: 5px;"> <tr> <td style="width: 80%; padding: 2px;"> </td> <td style="width: 20%;"></td> </tr> <tr> <td style="padding: 2px;"> </td> <td></td> </tr> <tr> <td style="padding: 2px;"> </td> <td></td> </tr> </table>                                                                                                                                    |                                        |  |  |  |  |  |
|                                                           |                                                                                                                                                                                |                                                                                                                                                                                                                                                                                                                                                                                                                                                                                      |                                        |  |  |  |  |  |
|                                                           |                                                                                                                                                                                |                                                                                                                                                                                                                                                                                                                                                                                                                                                                                      |                                        |  |  |  |  |  |
|                                                           |                                                                                                                                                                                |                                                                                                                                                                                                                                                                                                                                                                                                                                                                                      |                                        |  |  |  |  |  |

|    |                                                                                                              | Name all entities with whom you have this relationship or indicate none (add rows as needed)                                                                                                                                                                                                                                                                           | Specifications/Comments (e.g., if payments were made to you or to your institution) |  |  |  |  |  |  |  |  |
|----|--------------------------------------------------------------------------------------------------------------|------------------------------------------------------------------------------------------------------------------------------------------------------------------------------------------------------------------------------------------------------------------------------------------------------------------------------------------------------------------------|-------------------------------------------------------------------------------------|--|--|--|--|--|--|--|--|
| 4  | Consulting fees                                                                                              | <input checked="" type="checkbox"/> <b>None</b><br><table border="1" style="width: 100%; border-collapse: collapse;"> <tr><td style="width: 50%; height: 15px;"></td><td style="width: 50%;"></td></tr> <tr><td style="height: 15px;"></td><td></td></tr> <tr><td style="height: 15px;"></td><td></td></tr> <tr><td style="height: 15px;"></td><td></td></tr> </table> |                                                                                     |  |  |  |  |  |  |  |  |
|    |                                                                                                              |                                                                                                                                                                                                                                                                                                                                                                        |                                                                                     |  |  |  |  |  |  |  |  |
|    |                                                                                                              |                                                                                                                                                                                                                                                                                                                                                                        |                                                                                     |  |  |  |  |  |  |  |  |
|    |                                                                                                              |                                                                                                                                                                                                                                                                                                                                                                        |                                                                                     |  |  |  |  |  |  |  |  |
|    |                                                                                                              |                                                                                                                                                                                                                                                                                                                                                                        |                                                                                     |  |  |  |  |  |  |  |  |
| 5  | Payment or honoraria for lectures, presentations, speakers bureaus, manuscript writing or educational events | <input checked="" type="checkbox"/> <b>None</b><br><table border="1" style="width: 100%; border-collapse: collapse;"> <tr><td style="width: 50%; height: 15px;"></td><td style="width: 50%;"></td></tr> <tr><td style="height: 15px;"></td><td></td></tr> <tr><td style="height: 15px;"></td><td></td></tr> </table>                                                   |                                                                                     |  |  |  |  |  |  |  |  |
|    |                                                                                                              |                                                                                                                                                                                                                                                                                                                                                                        |                                                                                     |  |  |  |  |  |  |  |  |
|    |                                                                                                              |                                                                                                                                                                                                                                                                                                                                                                        |                                                                                     |  |  |  |  |  |  |  |  |
|    |                                                                                                              |                                                                                                                                                                                                                                                                                                                                                                        |                                                                                     |  |  |  |  |  |  |  |  |
| 6  | Payment for expert testimony                                                                                 | <input checked="" type="checkbox"/> <b>None</b><br><table border="1" style="width: 100%; border-collapse: collapse;"> <tr><td style="width: 50%; height: 15px;"></td><td style="width: 50%;"></td></tr> <tr><td style="height: 15px;"></td><td></td></tr> <tr><td style="height: 15px;"></td><td></td></tr> </table>                                                   |                                                                                     |  |  |  |  |  |  |  |  |
|    |                                                                                                              |                                                                                                                                                                                                                                                                                                                                                                        |                                                                                     |  |  |  |  |  |  |  |  |
|    |                                                                                                              |                                                                                                                                                                                                                                                                                                                                                                        |                                                                                     |  |  |  |  |  |  |  |  |
|    |                                                                                                              |                                                                                                                                                                                                                                                                                                                                                                        |                                                                                     |  |  |  |  |  |  |  |  |
| 7  | Support for attending meetings and/or travel                                                                 | <input checked="" type="checkbox"/> <b>None</b><br><table border="1" style="width: 100%; border-collapse: collapse;"> <tr><td style="width: 50%; height: 15px;"></td><td style="width: 50%;"></td></tr> <tr><td style="height: 15px;"></td><td></td></tr> <tr><td style="height: 15px;"></td><td></td></tr> </table>                                                   |                                                                                     |  |  |  |  |  |  |  |  |
|    |                                                                                                              |                                                                                                                                                                                                                                                                                                                                                                        |                                                                                     |  |  |  |  |  |  |  |  |
|    |                                                                                                              |                                                                                                                                                                                                                                                                                                                                                                        |                                                                                     |  |  |  |  |  |  |  |  |
|    |                                                                                                              |                                                                                                                                                                                                                                                                                                                                                                        |                                                                                     |  |  |  |  |  |  |  |  |
| 8  | Patents planned, issued or pending                                                                           | <input checked="" type="checkbox"/> <b>None</b><br><table border="1" style="width: 100%; border-collapse: collapse;"> <tr><td style="width: 50%; height: 15px;"></td><td style="width: 50%;"></td></tr> <tr><td style="height: 15px;"></td><td></td></tr> <tr><td style="height: 15px;"></td><td></td></tr> </table>                                                   |                                                                                     |  |  |  |  |  |  |  |  |
|    |                                                                                                              |                                                                                                                                                                                                                                                                                                                                                                        |                                                                                     |  |  |  |  |  |  |  |  |
|    |                                                                                                              |                                                                                                                                                                                                                                                                                                                                                                        |                                                                                     |  |  |  |  |  |  |  |  |
|    |                                                                                                              |                                                                                                                                                                                                                                                                                                                                                                        |                                                                                     |  |  |  |  |  |  |  |  |
| 9  | Participation on a Data Safety Monitoring Board or Advisory Board                                            | <input checked="" type="checkbox"/> <b>None</b><br><table border="1" style="width: 100%; border-collapse: collapse;"> <tr><td style="width: 50%; height: 15px;"></td><td style="width: 50%;"></td></tr> <tr><td style="height: 15px;"></td><td></td></tr> <tr><td style="height: 15px;"></td><td></td></tr> </table>                                                   |                                                                                     |  |  |  |  |  |  |  |  |
|    |                                                                                                              |                                                                                                                                                                                                                                                                                                                                                                        |                                                                                     |  |  |  |  |  |  |  |  |
|    |                                                                                                              |                                                                                                                                                                                                                                                                                                                                                                        |                                                                                     |  |  |  |  |  |  |  |  |
|    |                                                                                                              |                                                                                                                                                                                                                                                                                                                                                                        |                                                                                     |  |  |  |  |  |  |  |  |
| 10 | Leadership or fiduciary role in other board, society, committee or advocacy group, paid or unpaid            | <input checked="" type="checkbox"/> <b>None</b><br><table border="1" style="width: 100%; border-collapse: collapse;"> <tr><td style="width: 50%; height: 15px;"></td><td style="width: 50%;"></td></tr> <tr><td style="height: 15px;"></td><td></td></tr> <tr><td style="height: 15px;"></td><td></td></tr> </table>                                                   |                                                                                     |  |  |  |  |  |  |  |  |
|    |                                                                                                              |                                                                                                                                                                                                                                                                                                                                                                        |                                                                                     |  |  |  |  |  |  |  |  |
|    |                                                                                                              |                                                                                                                                                                                                                                                                                                                                                                        |                                                                                     |  |  |  |  |  |  |  |  |
|    |                                                                                                              |                                                                                                                                                                                                                                                                                                                                                                        |                                                                                     |  |  |  |  |  |  |  |  |



|    |                                                                                  | Name all entities with whom you have this relationship or indicate none (add rows as needed) | Specifications/Comments (e.g., if payments were made to you or to your institution) |
|----|----------------------------------------------------------------------------------|----------------------------------------------------------------------------------------------|-------------------------------------------------------------------------------------|
| 11 | Stock or stock options                                                           | <input type="checkbox"/> None                                                                |                                                                                     |
|    |                                                                                  | Johnson & Johnson                                                                            | Dated 25Apr2023                                                                     |
|    |                                                                                  |                                                                                              |                                                                                     |
|    |                                                                                  |                                                                                              |                                                                                     |
| 12 | Receipt of equipment, materials, drugs, medical writing, gifts or other services | <input checked="" type="checkbox"/> None                                                     |                                                                                     |
|    |                                                                                  |                                                                                              |                                                                                     |
|    |                                                                                  |                                                                                              |                                                                                     |
|    |                                                                                  |                                                                                              |                                                                                     |
| 13 | Other financial or non-financial interests                                       | <input checked="" type="checkbox"/> None                                                     |                                                                                     |
|    |                                                                                  |                                                                                              |                                                                                     |
|    |                                                                                  |                                                                                              |                                                                                     |
|    |                                                                                  |                                                                                              |                                                                                     |

Please place an "X" next to the following statement to indicate your agreement:

I certify that I have answered every question and have not altered the wording of any of the questions on this form.

## ICMJE DISCLOSURE FORM

**Date:** 7/18/2024

**Your Name:** Emmanouil Rampakakis

**Manuscript Title:** Persistent Patient-Level Effect of Guselkumab at Consecutive 8-Week Dosing Visits and Over Time in Patients with Active Psoriatic Arthritis: Post hoc Analysis of a 2-year, Phase 3 Randomized, Controlled Study

**Manuscript Number (if known):** ACROR-24-063.R1

In the interest of transparency, we ask you to disclose all relationships/activities/interests listed below that are related to the content of your manuscript. "Related" means any relation with for-profit or not-for-profit third parties whose interests may be affected by the content of the manuscript. Disclosure represents a commitment to transparency and does not necessarily indicate a bias. If you are in doubt about whether to list a relationship/activity/interest, it is preferable that you do so.

The author's relationships/activities/interests should be defined broadly. For example, if your manuscript pertains to the epidemiology of hypertension, you should declare all relationships with manufacturers of antihypertensive medication, even if that medication is not mentioned in the manuscript.

In item #1 below, report all support for the work reported in this manuscript without time limit. For all other items, the time frame for disclosure is the past 36 months.

|                                                    | Name all entities with whom you have this relationship or indicate none (add rows as needed)                                                                                   | Specifications/Comments (e.g., if payments were made to you or to your institution)                                                                                                                                                                                                                                                                                                                                                                              |                                        |  |  |  |  |                                           |
|----------------------------------------------------|--------------------------------------------------------------------------------------------------------------------------------------------------------------------------------|------------------------------------------------------------------------------------------------------------------------------------------------------------------------------------------------------------------------------------------------------------------------------------------------------------------------------------------------------------------------------------------------------------------------------------------------------------------|----------------------------------------|--|--|--|--|-------------------------------------------|
| Time frame: Since the initial planning of the work |                                                                                                                                                                                |                                                                                                                                                                                                                                                                                                                                                                                                                                                                  |                                        |  |  |  |  |                                           |
| <b>1</b>                                           | All support for the present manuscript (e.g., funding, provision of study materials, medical writing, article processing charges, etc.)<br><b>No time limit for this item.</b> | <input type="checkbox"/> <b>None</b><br><table border="1" style="width: 100%; border-collapse: collapse; margin-top: 5px;"> <tr> <td style="width: 60%; padding: 2px;">Janssen Research and Development, LLC.</td> <td style="width: 40%;"></td> </tr> <tr> <td style="height: 20px;"></td> <td></td> </tr> <tr> <td style="height: 20px;"></td> <td style="text-align: center; font-size: small;">Click the tab key to add additional rows.</td> </tr> </table> | Janssen Research and Development, LLC. |  |  |  |  | Click the tab key to add additional rows. |
| Janssen Research and Development, LLC.             |                                                                                                                                                                                |                                                                                                                                                                                                                                                                                                                                                                                                                                                                  |                                        |  |  |  |  |                                           |
|                                                    |                                                                                                                                                                                |                                                                                                                                                                                                                                                                                                                                                                                                                                                                  |                                        |  |  |  |  |                                           |
|                                                    | Click the tab key to add additional rows.                                                                                                                                      |                                                                                                                                                                                                                                                                                                                                                                                                                                                                  |                                        |  |  |  |  |                                           |
| Time frame: past 36 months                         |                                                                                                                                                                                |                                                                                                                                                                                                                                                                                                                                                                                                                                                                  |                                        |  |  |  |  |                                           |
| <b>2</b>                                           | Grants or contracts from any entity (if not indicated in item #1 above).                                                                                                       | <input checked="" type="checkbox"/> <b>None</b><br><table border="1" style="width: 100%; border-collapse: collapse; margin-top: 5px;"> <tr> <td style="width: 60%; height: 20px;"></td> <td style="width: 40%;"></td> </tr> <tr> <td style="height: 20px;"></td> <td></td> </tr> <tr> <td style="height: 20px;"></td> <td></td> </tr> </table>                                                                                                                   |                                        |  |  |  |  |                                           |
|                                                    |                                                                                                                                                                                |                                                                                                                                                                                                                                                                                                                                                                                                                                                                  |                                        |  |  |  |  |                                           |
|                                                    |                                                                                                                                                                                |                                                                                                                                                                                                                                                                                                                                                                                                                                                                  |                                        |  |  |  |  |                                           |
|                                                    |                                                                                                                                                                                |                                                                                                                                                                                                                                                                                                                                                                                                                                                                  |                                        |  |  |  |  |                                           |
| <b>3</b>                                           | Royalties or licenses                                                                                                                                                          | <input checked="" type="checkbox"/> <b>None</b><br><table border="1" style="width: 100%; border-collapse: collapse; margin-top: 5px;"> <tr> <td style="width: 60%; height: 20px;"></td> <td style="width: 40%;"></td> </tr> <tr> <td style="height: 20px;"></td> <td></td> </tr> <tr> <td style="height: 20px;"></td> <td></td> </tr> </table>                                                                                                                   |                                        |  |  |  |  |                                           |
|                                                    |                                                                                                                                                                                |                                                                                                                                                                                                                                                                                                                                                                                                                                                                  |                                        |  |  |  |  |                                           |
|                                                    |                                                                                                                                                                                |                                                                                                                                                                                                                                                                                                                                                                                                                                                                  |                                        |  |  |  |  |                                           |
|                                                    |                                                                                                                                                                                |                                                                                                                                                                                                                                                                                                                                                                                                                                                                  |                                        |  |  |  |  |                                           |

|         |                                                                                                              | Name all entities with whom you have this relationship or indicate none (add rows as needed)                                                                                        | Specifications/Comments (e.g., if payments were made to you or to your institution) |  |  |  |  |  |  |  |  |
|---------|--------------------------------------------------------------------------------------------------------------|-------------------------------------------------------------------------------------------------------------------------------------------------------------------------------------|-------------------------------------------------------------------------------------|--|--|--|--|--|--|--|--|
| 4       | Consulting fees                                                                                              | <input type="checkbox"/> None<br><table border="1"> <tr><td>Janssen</td><td></td></tr> <tr><td></td><td></td></tr> <tr><td></td><td></td></tr> <tr><td></td><td></td></tr> </table> | Janssen                                                                             |  |  |  |  |  |  |  |  |
| Janssen |                                                                                                              |                                                                                                                                                                                     |                                                                                     |  |  |  |  |  |  |  |  |
|         |                                                                                                              |                                                                                                                                                                                     |                                                                                     |  |  |  |  |  |  |  |  |
|         |                                                                                                              |                                                                                                                                                                                     |                                                                                     |  |  |  |  |  |  |  |  |
|         |                                                                                                              |                                                                                                                                                                                     |                                                                                     |  |  |  |  |  |  |  |  |
| 5       | Payment or honoraria for lectures, presentations, speakers bureaus, manuscript writing or educational events | <input checked="" type="checkbox"/> None<br><table border="1"> <tr><td></td><td></td></tr> <tr><td></td><td></td></tr> <tr><td></td><td></td></tr> </table>                         |                                                                                     |  |  |  |  |  |  |  |  |
|         |                                                                                                              |                                                                                                                                                                                     |                                                                                     |  |  |  |  |  |  |  |  |
|         |                                                                                                              |                                                                                                                                                                                     |                                                                                     |  |  |  |  |  |  |  |  |
|         |                                                                                                              |                                                                                                                                                                                     |                                                                                     |  |  |  |  |  |  |  |  |
| 6       | Payment for expert testimony                                                                                 | <input checked="" type="checkbox"/> None<br><table border="1"> <tr><td></td><td></td></tr> <tr><td></td><td></td></tr> <tr><td></td><td></td></tr> </table>                         |                                                                                     |  |  |  |  |  |  |  |  |
|         |                                                                                                              |                                                                                                                                                                                     |                                                                                     |  |  |  |  |  |  |  |  |
|         |                                                                                                              |                                                                                                                                                                                     |                                                                                     |  |  |  |  |  |  |  |  |
|         |                                                                                                              |                                                                                                                                                                                     |                                                                                     |  |  |  |  |  |  |  |  |
| 7       | Support for attending meetings and/or travel                                                                 | <input checked="" type="checkbox"/> None<br><table border="1"> <tr><td></td><td></td></tr> <tr><td></td><td></td></tr> <tr><td></td><td></td></tr> </table>                         |                                                                                     |  |  |  |  |  |  |  |  |
|         |                                                                                                              |                                                                                                                                                                                     |                                                                                     |  |  |  |  |  |  |  |  |
|         |                                                                                                              |                                                                                                                                                                                     |                                                                                     |  |  |  |  |  |  |  |  |
|         |                                                                                                              |                                                                                                                                                                                     |                                                                                     |  |  |  |  |  |  |  |  |
| 8       | Patents planned, issued or pending                                                                           | <input checked="" type="checkbox"/> None<br><table border="1"> <tr><td></td><td></td></tr> <tr><td></td><td></td></tr> <tr><td></td><td></td></tr> </table>                         |                                                                                     |  |  |  |  |  |  |  |  |
|         |                                                                                                              |                                                                                                                                                                                     |                                                                                     |  |  |  |  |  |  |  |  |
|         |                                                                                                              |                                                                                                                                                                                     |                                                                                     |  |  |  |  |  |  |  |  |
|         |                                                                                                              |                                                                                                                                                                                     |                                                                                     |  |  |  |  |  |  |  |  |
| 9       | Participation on a Data Safety Monitoring Board or Advisory Board                                            | <input checked="" type="checkbox"/> None<br><table border="1"> <tr><td></td><td></td></tr> <tr><td></td><td></td></tr> <tr><td></td><td></td></tr> </table>                         |                                                                                     |  |  |  |  |  |  |  |  |
|         |                                                                                                              |                                                                                                                                                                                     |                                                                                     |  |  |  |  |  |  |  |  |
|         |                                                                                                              |                                                                                                                                                                                     |                                                                                     |  |  |  |  |  |  |  |  |
|         |                                                                                                              |                                                                                                                                                                                     |                                                                                     |  |  |  |  |  |  |  |  |
| 10      | Leadership or fiduciary role in other board, society, committee or advocacy group, paid or unpaid            | <input checked="" type="checkbox"/> None<br><table border="1"> <tr><td></td><td></td></tr> <tr><td></td><td></td></tr> <tr><td></td><td></td></tr> </table>                         |                                                                                     |  |  |  |  |  |  |  |  |
|         |                                                                                                              |                                                                                                                                                                                     |                                                                                     |  |  |  |  |  |  |  |  |
|         |                                                                                                              |                                                                                                                                                                                     |                                                                                     |  |  |  |  |  |  |  |  |
|         |                                                                                                              |                                                                                                                                                                                     |                                                                                     |  |  |  |  |  |  |  |  |

|           |                                                                                  | Name all entities with whom you have this relationship or indicate none (add rows as needed)                                                                                                                                                                                                                         | Specifications/Comments (e.g., if payments were made to you or to your institution) |  |  |  |  |  |  |
|-----------|----------------------------------------------------------------------------------|----------------------------------------------------------------------------------------------------------------------------------------------------------------------------------------------------------------------------------------------------------------------------------------------------------------------|-------------------------------------------------------------------------------------|--|--|--|--|--|--|
| <b>11</b> | Stock or stock options                                                           | <input checked="" type="checkbox"/> <b>None</b><br><table border="1" style="width: 100%; border-collapse: collapse;"> <tr><td style="width: 50%; height: 15px;"></td><td style="width: 50%;"></td></tr> <tr><td style="height: 15px;"></td><td></td></tr> <tr><td style="height: 15px;"></td><td></td></tr> </table> |                                                                                     |  |  |  |  |  |  |
|           |                                                                                  |                                                                                                                                                                                                                                                                                                                      |                                                                                     |  |  |  |  |  |  |
|           |                                                                                  |                                                                                                                                                                                                                                                                                                                      |                                                                                     |  |  |  |  |  |  |
|           |                                                                                  |                                                                                                                                                                                                                                                                                                                      |                                                                                     |  |  |  |  |  |  |
| <b>12</b> | Receipt of equipment, materials, drugs, medical writing, gifts or other services | <input checked="" type="checkbox"/> <b>None</b><br><table border="1" style="width: 100%; border-collapse: collapse;"> <tr><td style="width: 50%; height: 15px;"></td><td style="width: 50%;"></td></tr> <tr><td style="height: 15px;"></td><td></td></tr> <tr><td style="height: 15px;"></td><td></td></tr> </table> |                                                                                     |  |  |  |  |  |  |
|           |                                                                                  |                                                                                                                                                                                                                                                                                                                      |                                                                                     |  |  |  |  |  |  |
|           |                                                                                  |                                                                                                                                                                                                                                                                                                                      |                                                                                     |  |  |  |  |  |  |
|           |                                                                                  |                                                                                                                                                                                                                                                                                                                      |                                                                                     |  |  |  |  |  |  |
| <b>13</b> | Other financial or non-financial interests                                       | <input checked="" type="checkbox"/> <b>None</b><br><table border="1" style="width: 100%; border-collapse: collapse;"> <tr><td style="width: 50%; height: 15px;"></td><td style="width: 50%;"></td></tr> <tr><td style="height: 15px;"></td><td></td></tr> <tr><td style="height: 15px;"></td><td></td></tr> </table> |                                                                                     |  |  |  |  |  |  |
|           |                                                                                  |                                                                                                                                                                                                                                                                                                                      |                                                                                     |  |  |  |  |  |  |
|           |                                                                                  |                                                                                                                                                                                                                                                                                                                      |                                                                                     |  |  |  |  |  |  |
|           |                                                                                  |                                                                                                                                                                                                                                                                                                                      |                                                                                     |  |  |  |  |  |  |

**Please place an "X" next to the following statement to indicate your agreement:**

I certify that I have answered every question and have not altered the wording of any of the questions on this form.

# ICMJE DISCLOSURE FORM

**Date:** 7/18/2024

**Your Name:** Peter Nash

**Manuscript Title:** Persistent Patient-Level Effect of Guselkumab at Consecutive 8-Week Dosing Visits and Over Time in Patients with Active Psoriatic Arthritis: Post hoc Analysis of a 2-year, Phase 3 Randomized, Controlled Study

**Manuscript Number (if known):** ACROR-24-063.R1

In the interest of transparency, we ask you to disclose all relationships/activities/interests listed below that are related to the content of your manuscript. "Related" means any relation with for-profit or not-for-profit third parties whose interests may be affected by the content of the manuscript. Disclosure represents a commitment to transparency and does not necessarily indicate a bias. If you are in doubt about whether to list a relationship/activity/interest, it is preferable that you do so.

The author's relationships/activities/interests should be defined broadly. For example, if your manuscript pertains to the epidemiology of hypertension, you should declare all relationships with manufacturers of antihypertensive medication, even if that medication is not mentioned in the manuscript.

In item #1 below, report all support for the work reported in this manuscript without time limit. For all other items, the time frame for disclosure is the past 36 months.

|                                                    | Name all entities with whom you have this relationship or indicate none (add rows as needed)                                                                                   | Specifications/Comments (e.g., if payments were made to you or to your institution)                                                                                                                                                                                                                                                                                                                                                                                                        |                                        |  |       |  |                      |  |                      |  |         |  |           |  |           |  |                 |  |         |  |
|----------------------------------------------------|--------------------------------------------------------------------------------------------------------------------------------------------------------------------------------|--------------------------------------------------------------------------------------------------------------------------------------------------------------------------------------------------------------------------------------------------------------------------------------------------------------------------------------------------------------------------------------------------------------------------------------------------------------------------------------------|----------------------------------------|--|-------|--|----------------------|--|----------------------|--|---------|--|-----------|--|-----------|--|-----------------|--|---------|--|
| Time frame: Since the initial planning of the work |                                                                                                                                                                                |                                                                                                                                                                                                                                                                                                                                                                                                                                                                                            |                                        |  |       |  |                      |  |                      |  |         |  |           |  |           |  |                 |  |         |  |
| <b>1</b>                                           | All support for the present manuscript (e.g., funding, provision of study materials, medical writing, article processing charges, etc.)<br><b>No time limit for this item.</b> | <input type="checkbox"/> <b>None</b><br><table border="1" style="width: 100%; border-collapse: collapse;"> <tr><td>Janssen Research and Development, LLC.</td></tr> <tr><td> </td></tr> </table>                                                                                   | Janssen Research and Development, LLC. |  |       |  |                      |  |                      |  |         |  |           |  |           |  |                 |  |         |  |
| Janssen Research and Development, LLC.             |                                                                                                                                                                                |                                                                                                                                                                                                                                                                                                                                                                                                                                                                                            |                                        |  |       |  |                      |  |                      |  |         |  |           |  |           |  |                 |  |         |  |
|                                                    |                                                                                                                                                                                |                                                                                                                                                                                                                                                                                                                                                                                                                                                                                            |                                        |  |       |  |                      |  |                      |  |         |  |           |  |           |  |                 |  |         |  |
|                                                    |                                                                                                                                                                                |                                                                                                                                                                                                                                                                                                                                                                                                                                                                                            |                                        |  |       |  |                      |  |                      |  |         |  |           |  |           |  |                 |  |         |  |
|                                                    |                                                                                                                                                                                |                                                                                                                                                                                                                                                                                                                                                                                                                                                                                            |                                        |  |       |  |                      |  |                      |  |         |  |           |  |           |  |                 |  |         |  |
|                                                    |                                                                                                                                                                                |                                                                                                                                                                                                                                                                                                                                                                                                                                                                                            |                                        |  |       |  |                      |  |                      |  |         |  |           |  |           |  |                 |  |         |  |
|                                                    |                                                                                                                                                                                |                                                                                                                                                                                                                                                                                                                                                                                                                                                                                            |                                        |  |       |  |                      |  |                      |  |         |  |           |  |           |  |                 |  |         |  |
|                                                    |                                                                                                                                                                                |                                                                                                                                                                                                                                                                                                                                                                                                                                                                                            |                                        |  |       |  |                      |  |                      |  |         |  |           |  |           |  |                 |  |         |  |
|                                                    |                                                                                                                                                                                |                                                                                                                                                                                                                                                                                                                                                                                                                                                                                            |                                        |  |       |  |                      |  |                      |  |         |  |           |  |           |  |                 |  |         |  |
|                                                    |                                                                                                                                                                                |                                                                                                                                                                                                                                                                                                                                                                                                                                                                                            |                                        |  |       |  |                      |  |                      |  |         |  |           |  |           |  |                 |  |         |  |
|                                                    |                                                                                                                                                                                |                                                                                                                                                                                                                                                                                                                                                                                                                                                                                            |                                        |  |       |  |                      |  |                      |  |         |  |           |  |           |  |                 |  |         |  |
|                                                    |                                                                                                                                                                                |                                                                                                                                                                                                                                                                                                                                                                                                                                                                                            |                                        |  |       |  |                      |  |                      |  |         |  |           |  |           |  |                 |  |         |  |
|                                                    |                                                                                                                                                                                |                                                                                                                                                                                                                                                                                                                                                                                                                                                                                            |                                        |  |       |  |                      |  |                      |  |         |  |           |  |           |  |                 |  |         |  |
| Time frame: past 36 months                         |                                                                                                                                                                                |                                                                                                                                                                                                                                                                                                                                                                                                                                                                                            |                                        |  |       |  |                      |  |                      |  |         |  |           |  |           |  |                 |  |         |  |
| <b>2</b>                                           | Grants or contracts from any entity (if not indicated in item #1 above).                                                                                                       | <input type="checkbox"/> <b>None</b><br><table border="1" style="width: 100%; border-collapse: collapse;"> <tr><td>AbbVie</td><td> </td></tr> <tr><td>Amgen</td><td> </td></tr> <tr><td>Boehringer Ingelheim</td><td> </td></tr> <tr><td>Bristol Myers Squibb</td><td> </td></tr> <tr><td>Celgene</td><td> </td></tr> <tr><td>Eli Lilly</td><td> </td></tr> <tr><td>Galapagos</td><td> </td></tr> <tr><td>GlaxoSmithKline</td><td> </td></tr> <tr><td>Janssen</td><td> </td></tr> </table> | AbbVie                                 |  | Amgen |  | Boehringer Ingelheim |  | Bristol Myers Squibb |  | Celgene |  | Eli Lilly |  | Galapagos |  | GlaxoSmithKline |  | Janssen |  |
| AbbVie                                             |                                                                                                                                                                                |                                                                                                                                                                                                                                                                                                                                                                                                                                                                                            |                                        |  |       |  |                      |  |                      |  |         |  |           |  |           |  |                 |  |         |  |
| Amgen                                              |                                                                                                                                                                                |                                                                                                                                                                                                                                                                                                                                                                                                                                                                                            |                                        |  |       |  |                      |  |                      |  |         |  |           |  |           |  |                 |  |         |  |
| Boehringer Ingelheim                               |                                                                                                                                                                                |                                                                                                                                                                                                                                                                                                                                                                                                                                                                                            |                                        |  |       |  |                      |  |                      |  |         |  |           |  |           |  |                 |  |         |  |
| Bristol Myers Squibb                               |                                                                                                                                                                                |                                                                                                                                                                                                                                                                                                                                                                                                                                                                                            |                                        |  |       |  |                      |  |                      |  |         |  |           |  |           |  |                 |  |         |  |
| Celgene                                            |                                                                                                                                                                                |                                                                                                                                                                                                                                                                                                                                                                                                                                                                                            |                                        |  |       |  |                      |  |                      |  |         |  |           |  |           |  |                 |  |         |  |
| Eli Lilly                                          |                                                                                                                                                                                |                                                                                                                                                                                                                                                                                                                                                                                                                                                                                            |                                        |  |       |  |                      |  |                      |  |         |  |           |  |           |  |                 |  |         |  |
| Galapagos                                          |                                                                                                                                                                                |                                                                                                                                                                                                                                                                                                                                                                                                                                                                                            |                                        |  |       |  |                      |  |                      |  |         |  |           |  |           |  |                 |  |         |  |
| GlaxoSmithKline                                    |                                                                                                                                                                                |                                                                                                                                                                                                                                                                                                                                                                                                                                                                                            |                                        |  |       |  |                      |  |                      |  |         |  |           |  |           |  |                 |  |         |  |
| Janssen                                            |                                                                                                                                                                                |                                                                                                                                                                                                                                                                                                                                                                                                                                                                                            |                                        |  |       |  |                      |  |                      |  |         |  |           |  |           |  |                 |  |         |  |

|          |                                                                                                              | Name all entities with whom you have this relationship or indicate none (add rows as needed)                                                                                                                       | Specifications/Comments (e.g., if payments were made to you or to your institution) |
|----------|--------------------------------------------------------------------------------------------------------------|--------------------------------------------------------------------------------------------------------------------------------------------------------------------------------------------------------------------|-------------------------------------------------------------------------------------|
|          |                                                                                                              | Novartis<br>Pfizer<br>Sun<br>UCB                                                                                                                                                                                   |                                                                                     |
| <b>3</b> | Royalties or licenses                                                                                        | <input checked="" type="checkbox"/> <b>None</b><br><br><br>                                                                                                                                                        |                                                                                     |
| <b>4</b> | Consulting fees                                                                                              | <input checked="" type="checkbox"/> <b>None</b><br><br><br>                                                                                                                                                        |                                                                                     |
| <b>5</b> | Payment or honoraria for lectures, presentations, speakers bureaus, manuscript writing or educational events | <input type="checkbox"/> <b>None</b><br><br>AbbVie<br>Amgen<br>Boehringer Ingelheim<br>Bristol Myers Squibb<br>Celgene<br>Eli Lilly<br>Galapagos<br>GlaxoSmithKline<br>Janssen<br>Novartis<br>Pfizer<br>Sun<br>UCB |                                                                                     |
| <b>6</b> | Payment for expert testimony                                                                                 | <input checked="" type="checkbox"/> <b>None</b><br><br><br>                                                                                                                                                        |                                                                                     |
| <b>7</b> | Support for attending meetings and/or travel                                                                 | <input checked="" type="checkbox"/> <b>None</b><br><br><br>                                                                                                                                                        |                                                                                     |

|           |                                                                                                   | Name all entities with whom you have this relationship or indicate none (add rows as needed) | Specifications/Comments (e.g., if payments were made to you or to your institution) |
|-----------|---------------------------------------------------------------------------------------------------|----------------------------------------------------------------------------------------------|-------------------------------------------------------------------------------------|
| <b>8</b>  | Patents planned, issued or pending                                                                | <input checked="" type="checkbox"/> <b>None</b>                                              |                                                                                     |
|           |                                                                                                   |                                                                                              |                                                                                     |
|           |                                                                                                   |                                                                                              |                                                                                     |
| <b>9</b>  | Participation on a Data Safety Monitoring Board or Advisory Board                                 | <input checked="" type="checkbox"/> <b>None</b>                                              |                                                                                     |
|           |                                                                                                   |                                                                                              |                                                                                     |
|           |                                                                                                   |                                                                                              |                                                                                     |
| <b>10</b> | Leadership or fiduciary role in other board, society, committee or advocacy group, paid or unpaid | <input checked="" type="checkbox"/> <b>None</b>                                              |                                                                                     |
|           |                                                                                                   |                                                                                              |                                                                                     |
|           |                                                                                                   |                                                                                              |                                                                                     |
| <b>11</b> | Stock or stock options                                                                            | <input checked="" type="checkbox"/> <b>None</b>                                              |                                                                                     |
|           |                                                                                                   |                                                                                              |                                                                                     |
|           |                                                                                                   |                                                                                              |                                                                                     |
| <b>12</b> | Receipt of equipment, materials, drugs, medical writing, gifts or other services                  | <input checked="" type="checkbox"/> <b>None</b>                                              |                                                                                     |
|           |                                                                                                   |                                                                                              |                                                                                     |
|           |                                                                                                   |                                                                                              |                                                                                     |
| <b>13</b> | Other financial or non-financial interests                                                        | <input checked="" type="checkbox"/> <b>None</b>                                              |                                                                                     |
|           |                                                                                                   |                                                                                              |                                                                                     |
|           |                                                                                                   |                                                                                              |                                                                                     |

Please place an "X" next to the following statement to indicate your agreement:

I certify that I have answered every question and have not altered the wording of any of the questions on this form.

## ICMJE DISCLOSURE FORM

**Date:** 7/18/2024

**Your Name:** Joseph F Merola

**Manuscript Title:** Persistent Patient-Level Effect of Guselkumab at Consecutive 8-Week Dosing Visits and Over Time in Patients with Active Psoriatic Arthritis: Post hoc Analysis of a 2-year, Phase 3 Randomized, Controlled Study

**Manuscript Number (if known):** ACROR-24-063.R1

In the interest of transparency, we ask you to disclose all relationships/activities/interests listed below that are related to the content of your manuscript. "Related" means any relation with for-profit or not-for-profit third parties whose interests may be affected by the content of the manuscript. Disclosure represents a commitment to transparency and does not necessarily indicate a bias. If you are in doubt about whether to list a relationship/activity/interest, it is preferable that you do so.

The author's relationships/activities/interests should be defined broadly. For example, if your manuscript pertains to the epidemiology of hypertension, you should declare all relationships with manufacturers of antihypertensive medication, even if that medication is not mentioned in the manuscript.

In item #1 below, report all support for the work reported in this manuscript without time limit. For all other items, the time frame for disclosure is the past 36 months.

|                                                    | Name all entities with whom you have this relationship or indicate none (add rows as needed)                                                                                   | Specifications/Comments (e.g., if payments were made to you or to your institution)                                                                                                                                                                                                                                                                                                                              |                                               |  |  |  |  |                                           |
|----------------------------------------------------|--------------------------------------------------------------------------------------------------------------------------------------------------------------------------------|------------------------------------------------------------------------------------------------------------------------------------------------------------------------------------------------------------------------------------------------------------------------------------------------------------------------------------------------------------------------------------------------------------------|-----------------------------------------------|--|--|--|--|-------------------------------------------|
| Time frame: Since the initial planning of the work |                                                                                                                                                                                |                                                                                                                                                                                                                                                                                                                                                                                                                  |                                               |  |  |  |  |                                           |
| <b>1</b>                                           | All support for the present manuscript (e.g., funding, provision of study materials, medical writing, article processing charges, etc.)<br><b>No time limit for this item.</b> | <input type="checkbox"/> <b>None</b><br><table border="1" style="width: 100%; border-collapse: collapse; margin-top: 5px;"> <tr> <td style="width: 60%;"><u>Janssen Research and Development, LLC.</u></td> <td style="width: 40%;"></td> </tr> <tr> <td> </td> <td> </td> </tr> <tr> <td> </td> <td style="text-align: center; font-size: small;">Click the tab key to add additional rows.</td> </tr> </table> | <u>Janssen Research and Development, LLC.</u> |  |  |  |  | Click the tab key to add additional rows. |
| <u>Janssen Research and Development, LLC.</u>      |                                                                                                                                                                                |                                                                                                                                                                                                                                                                                                                                                                                                                  |                                               |  |  |  |  |                                           |
|                                                    |                                                                                                                                                                                |                                                                                                                                                                                                                                                                                                                                                                                                                  |                                               |  |  |  |  |                                           |
|                                                    | Click the tab key to add additional rows.                                                                                                                                      |                                                                                                                                                                                                                                                                                                                                                                                                                  |                                               |  |  |  |  |                                           |
| Time frame: past 36 months                         |                                                                                                                                                                                |                                                                                                                                                                                                                                                                                                                                                                                                                  |                                               |  |  |  |  |                                           |
| <b>2</b>                                           | Grants or contracts from any entity (if not indicated in item #1 above).                                                                                                       | <input checked="" type="checkbox"/> <b>None</b><br><table border="1" style="width: 100%; border-collapse: collapse; margin-top: 5px;"> <tr> <td style="width: 60%;"></td> <td style="width: 40%;"></td> </tr> <tr> <td> </td> <td> </td> </tr> <tr> <td> </td> <td> </td> </tr> </table>                                                                                                                         |                                               |  |  |  |  |                                           |
|                                                    |                                                                                                                                                                                |                                                                                                                                                                                                                                                                                                                                                                                                                  |                                               |  |  |  |  |                                           |
|                                                    |                                                                                                                                                                                |                                                                                                                                                                                                                                                                                                                                                                                                                  |                                               |  |  |  |  |                                           |
|                                                    |                                                                                                                                                                                |                                                                                                                                                                                                                                                                                                                                                                                                                  |                                               |  |  |  |  |                                           |
| <b>3</b>                                           | Royalties or licenses                                                                                                                                                          | <input checked="" type="checkbox"/> <b>None</b><br><table border="1" style="width: 100%; border-collapse: collapse; margin-top: 5px;"> <tr> <td style="width: 60%;"></td> <td style="width: 40%;"></td> </tr> <tr> <td> </td> <td> </td> </tr> <tr> <td> </td> <td> </td> </tr> </table>                                                                                                                         |                                               |  |  |  |  |                                           |
|                                                    |                                                                                                                                                                                |                                                                                                                                                                                                                                                                                                                                                                                                                  |                                               |  |  |  |  |                                           |
|                                                    |                                                                                                                                                                                |                                                                                                                                                                                                                                                                                                                                                                                                                  |                                               |  |  |  |  |                                           |
|                                                    |                                                                                                                                                                                |                                                                                                                                                                                                                                                                                                                                                                                                                  |                                               |  |  |  |  |                                           |



|     |                                                                                                              | Name all entities with whom you have this relationship or indicate none (add rows as needed) | Specifications/Comments (e.g., if payments were made to you or to your institution) |
|-----|--------------------------------------------------------------------------------------------------------------|----------------------------------------------------------------------------------------------|-------------------------------------------------------------------------------------|
| 4   | Consulting fees                                                                                              | <input type="checkbox"/> None                                                                |                                                                                     |
|     |                                                                                                              | AbbVie                                                                                       |                                                                                     |
|     |                                                                                                              | Amgen                                                                                        |                                                                                     |
|     |                                                                                                              | Astra Zeneca                                                                                 |                                                                                     |
|     |                                                                                                              | Biogen                                                                                       |                                                                                     |
|     |                                                                                                              | Boehringer Ingelheim                                                                         |                                                                                     |
|     |                                                                                                              | Bristol Myers Squibb                                                                         |                                                                                     |
|     |                                                                                                              | Dermavant                                                                                    |                                                                                     |
|     |                                                                                                              | Eli Lilly                                                                                    |                                                                                     |
|     |                                                                                                              | Incyte                                                                                       |                                                                                     |
|     |                                                                                                              | Janssen                                                                                      |                                                                                     |
|     |                                                                                                              | Leo Pharma                                                                                   |                                                                                     |
|     |                                                                                                              | Moonlake                                                                                     |                                                                                     |
|     |                                                                                                              | Novartis                                                                                     |                                                                                     |
|     |                                                                                                              | Pfizer                                                                                       |                                                                                     |
|     |                                                                                                              | Sanofi-Regeneron                                                                             |                                                                                     |
|     |                                                                                                              | Sun Pharma                                                                                   |                                                                                     |
| UCB |                                                                                                              |                                                                                              |                                                                                     |
| 5   | Payment or honoraria for lectures, presentations, speakers bureaus, manuscript writing or educational events | <input checked="" type="checkbox"/> None                                                     |                                                                                     |
|     |                                                                                                              |                                                                                              |                                                                                     |
|     |                                                                                                              |                                                                                              |                                                                                     |
|     |                                                                                                              |                                                                                              |                                                                                     |
| 6   | Payment for expert testimony                                                                                 | <input checked="" type="checkbox"/> None                                                     |                                                                                     |
|     |                                                                                                              |                                                                                              |                                                                                     |
|     |                                                                                                              |                                                                                              |                                                                                     |
|     |                                                                                                              |                                                                                              |                                                                                     |
| 7   | Support for attending meetings and/or travel                                                                 | <input checked="" type="checkbox"/> None                                                     |                                                                                     |
|     |                                                                                                              |                                                                                              |                                                                                     |
|     |                                                                                                              |                                                                                              |                                                                                     |
|     |                                                                                                              |                                                                                              |                                                                                     |
| 8   | Patents planned, issued or pending                                                                           | <input checked="" type="checkbox"/> None                                                     |                                                                                     |
|     |                                                                                                              |                                                                                              |                                                                                     |
|     |                                                                                                              |                                                                                              |                                                                                     |
|     |                                                                                                              |                                                                                              |                                                                                     |
| 9   | Participation on a Data Safety Monitoring                                                                    | <input checked="" type="checkbox"/> None                                                     |                                                                                     |
|     |                                                                                                              |                                                                                              |                                                                                     |

|           |                                                                                                   | Name all entities with whom you have this relationship or indicate none (add rows as needed) | Specifications/Comments (e.g., if payments were made to you or to your institution) |
|-----------|---------------------------------------------------------------------------------------------------|----------------------------------------------------------------------------------------------|-------------------------------------------------------------------------------------|
|           | Board or Advisory Board                                                                           |                                                                                              |                                                                                     |
| <b>10</b> | Leadership or fiduciary role in other board, society, committee or advocacy group, paid or unpaid | <input checked="" type="checkbox"/> <b>None</b>                                              |                                                                                     |
|           |                                                                                                   |                                                                                              |                                                                                     |
|           |                                                                                                   |                                                                                              |                                                                                     |
| <b>11</b> | Stock or stock options                                                                            | <input checked="" type="checkbox"/> <b>None</b>                                              |                                                                                     |
|           |                                                                                                   |                                                                                              |                                                                                     |
|           |                                                                                                   |                                                                                              |                                                                                     |
| <b>12</b> | Receipt of equipment, materials, drugs, medical writing, gifts or other services                  | <input checked="" type="checkbox"/> <b>None</b>                                              |                                                                                     |
|           |                                                                                                   |                                                                                              |                                                                                     |
|           |                                                                                                   |                                                                                              |                                                                                     |
| <b>13</b> | Other financial or non-financial interests                                                        | <input checked="" type="checkbox"/> <b>None</b>                                              |                                                                                     |
|           |                                                                                                   |                                                                                              |                                                                                     |
|           |                                                                                                   |                                                                                              |                                                                                     |

Please place an "X" next to the following statement to indicate your agreement:

I certify that I have answered every question and have not altered the wording of any of the questions on this form.

## ICMJE DISCLOSURE FORM

**Date:** 7/18/2024

**Your Name:** Philip J. Mease

**Manuscript Title:** Persistent Patient-Level Effect of Guselkumab at Consecutive 8-Week Dosing Visits and Over Time in Patients with Active Psoriatic Arthritis: Post hoc Analysis of a 2-year, Phase 3 Randomized, Controlled Study

**Manuscript Number (if known):** ACROR-24-063.R1

In the interest of transparency, we ask you to disclose all relationships/activities/interests listed below that are related to the content of your manuscript. "Related" means any relation with for-profit or not-for-profit third parties whose interests may be affected by the content of the manuscript. Disclosure represents a commitment to transparency and does not necessarily indicate a bias. If you are in doubt about whether to list a relationship/activity/interest, it is preferable that you do so.

The author's relationships/activities/interests should be defined broadly. For example, if your manuscript pertains to the epidemiology of hypertension, you should declare all relationships with manufacturers of antihypertensive medication, even if that medication is not mentioned in the manuscript.

In item #1 below, report all support for the work reported in this manuscript without time limit. For all other items, the time frame for disclosure is the past 36 months.

|                                                                                                                                                                                            | Name all entities with whom you have this relationship or indicate none (add rows as needed)                                                                                                                                                                                                                                                                                                                                                                                                                              | Specifications/Comments (e.g., if payments were made to you or to your institution) |  |                 |  |              |  |                                           |  |                  |  |                |  |                 |  |            |  |  |
|--------------------------------------------------------------------------------------------------------------------------------------------------------------------------------------------|---------------------------------------------------------------------------------------------------------------------------------------------------------------------------------------------------------------------------------------------------------------------------------------------------------------------------------------------------------------------------------------------------------------------------------------------------------------------------------------------------------------------------|-------------------------------------------------------------------------------------|--|-----------------|--|--------------|--|-------------------------------------------|--|------------------|--|----------------|--|-----------------|--|------------|--|--|
| Time frame: Since the initial planning of the work                                                                                                                                         |                                                                                                                                                                                                                                                                                                                                                                                                                                                                                                                           |                                                                                     |  |                 |  |              |  |                                           |  |                  |  |                |  |                 |  |            |  |  |
| <b>1</b><br>All support for the present manuscript (e.g., funding, provision of study materials, medical writing, article processing charges, etc.)<br><b>No time limit for this item.</b> | <input type="checkbox"/> <b>None</b><br><br><table border="1" style="width: 100%; border-collapse: collapse;"> <tr> <td style="width: 80%;"><u>Janssen Research and Development, LLC.</u></td> <td style="width: 20%;"></td> </tr> <tr> <td> </td> <td> </td> </tr> <tr> <td> </td> <td> </td> </tr> </table>                                                                                                                                                                                                             | <u>Janssen Research and Development, LLC.</u>                                       |  |                 |  |              |  | Click the tab key to add additional rows. |  |                  |  |                |  |                 |  |            |  |  |
| <u>Janssen Research and Development, LLC.</u>                                                                                                                                              |                                                                                                                                                                                                                                                                                                                                                                                                                                                                                                                           |                                                                                     |  |                 |  |              |  |                                           |  |                  |  |                |  |                 |  |            |  |  |
|                                                                                                                                                                                            |                                                                                                                                                                                                                                                                                                                                                                                                                                                                                                                           |                                                                                     |  |                 |  |              |  |                                           |  |                  |  |                |  |                 |  |            |  |  |
|                                                                                                                                                                                            |                                                                                                                                                                                                                                                                                                                                                                                                                                                                                                                           |                                                                                     |  |                 |  |              |  |                                           |  |                  |  |                |  |                 |  |            |  |  |
| Time frame: past 36 months                                                                                                                                                                 |                                                                                                                                                                                                                                                                                                                                                                                                                                                                                                                           |                                                                                     |  |                 |  |              |  |                                           |  |                  |  |                |  |                 |  |            |  |  |
| <b>2</b><br>Grants or contracts from any entity (if not indicated in item #1 above).                                                                                                       | <input type="checkbox"/> <b>None</b><br><br><table border="1" style="width: 100%; border-collapse: collapse;"> <tr><td style="width: 80%;"><u>AbbVie</u></td><td style="width: 20%;"></td></tr> <tr><td><u>Acelyrin</u></td><td></td></tr> <tr><td><u>Amgen</u></td><td></td></tr> <tr><td><u>Bristol Myers Squibb</u></td><td></td></tr> <tr><td><u>Eli Lilly</u></td><td></td></tr> <tr><td><u>Janssen</u></td><td></td></tr> <tr><td><u>Novartis</u></td><td></td></tr> <tr><td><u>UCB</u></td><td></td></tr> </table> | <u>AbbVie</u>                                                                       |  | <u>Acelyrin</u> |  | <u>Amgen</u> |  | <u>Bristol Myers Squibb</u>               |  | <u>Eli Lilly</u> |  | <u>Janssen</u> |  | <u>Novartis</u> |  | <u>UCB</u> |  |  |
| <u>AbbVie</u>                                                                                                                                                                              |                                                                                                                                                                                                                                                                                                                                                                                                                                                                                                                           |                                                                                     |  |                 |  |              |  |                                           |  |                  |  |                |  |                 |  |            |  |  |
| <u>Acelyrin</u>                                                                                                                                                                            |                                                                                                                                                                                                                                                                                                                                                                                                                                                                                                                           |                                                                                     |  |                 |  |              |  |                                           |  |                  |  |                |  |                 |  |            |  |  |
| <u>Amgen</u>                                                                                                                                                                               |                                                                                                                                                                                                                                                                                                                                                                                                                                                                                                                           |                                                                                     |  |                 |  |              |  |                                           |  |                  |  |                |  |                 |  |            |  |  |
| <u>Bristol Myers Squibb</u>                                                                                                                                                                |                                                                                                                                                                                                                                                                                                                                                                                                                                                                                                                           |                                                                                     |  |                 |  |              |  |                                           |  |                  |  |                |  |                 |  |            |  |  |
| <u>Eli Lilly</u>                                                                                                                                                                           |                                                                                                                                                                                                                                                                                                                                                                                                                                                                                                                           |                                                                                     |  |                 |  |              |  |                                           |  |                  |  |                |  |                 |  |            |  |  |
| <u>Janssen</u>                                                                                                                                                                             |                                                                                                                                                                                                                                                                                                                                                                                                                                                                                                                           |                                                                                     |  |                 |  |              |  |                                           |  |                  |  |                |  |                 |  |            |  |  |
| <u>Novartis</u>                                                                                                                                                                            |                                                                                                                                                                                                                                                                                                                                                                                                                                                                                                                           |                                                                                     |  |                 |  |              |  |                                           |  |                  |  |                |  |                 |  |            |  |  |
| <u>UCB</u>                                                                                                                                                                                 |                                                                                                                                                                                                                                                                                                                                                                                                                                                                                                                           |                                                                                     |  |                 |  |              |  |                                           |  |                  |  |                |  |                 |  |            |  |  |

|                      |                                                                                                              | Name all entities with whom you have this relationship or indicate none (add rows as needed)                                                                                                                                                                                                                                                                                                                                                                                                                                                                                                                                                                                                                                                                                                                    | Specifications/Comments (e.g., if payments were made to you or to your institution) |  |          |  |           |  |                      |  |           |  |          |  |         |  |          |  |        |  |     |  |        |  |  |
|----------------------|--------------------------------------------------------------------------------------------------------------|-----------------------------------------------------------------------------------------------------------------------------------------------------------------------------------------------------------------------------------------------------------------------------------------------------------------------------------------------------------------------------------------------------------------------------------------------------------------------------------------------------------------------------------------------------------------------------------------------------------------------------------------------------------------------------------------------------------------------------------------------------------------------------------------------------------------|-------------------------------------------------------------------------------------|--|----------|--|-----------|--|----------------------|--|-----------|--|----------|--|---------|--|----------|--|--------|--|-----|--|--------|--|--|
| <b>3</b>             | Royalties or licenses                                                                                        | <input checked="" type="checkbox"/> <b>None</b><br><table border="1" style="width: 100%; border-collapse: collapse;"> <tr><td style="width: 50%; height: 20px;"></td><td style="width: 50%;"></td></tr> <tr><td style="height: 20px;"></td><td></td></tr> <tr><td style="height: 20px;"></td><td></td></tr> </table>                                                                                                                                                                                                                                                                                                                                                                                                                                                                                            |                                                                                     |  |          |  |           |  |                      |  |           |  |          |  |         |  |          |  |        |  |     |  |        |  |  |
|                      |                                                                                                              |                                                                                                                                                                                                                                                                                                                                                                                                                                                                                                                                                                                                                                                                                                                                                                                                                 |                                                                                     |  |          |  |           |  |                      |  |           |  |          |  |         |  |          |  |        |  |     |  |        |  |  |
|                      |                                                                                                              |                                                                                                                                                                                                                                                                                                                                                                                                                                                                                                                                                                                                                                                                                                                                                                                                                 |                                                                                     |  |          |  |           |  |                      |  |           |  |          |  |         |  |          |  |        |  |     |  |        |  |  |
|                      |                                                                                                              |                                                                                                                                                                                                                                                                                                                                                                                                                                                                                                                                                                                                                                                                                                                                                                                                                 |                                                                                     |  |          |  |           |  |                      |  |           |  |          |  |         |  |          |  |        |  |     |  |        |  |  |
| <b>4</b>             | Consulting fees                                                                                              | <input type="checkbox"/> <b>None</b><br><table border="1" style="width: 100%; border-collapse: collapse;"> <tr><td style="width: 50%; height: 20px;">AbbVie</td><td style="width: 50%;"></td></tr> <tr><td style="height: 20px;">Acelyrin</td><td></td></tr> <tr><td style="height: 20px;">Amgen</td><td></td></tr> <tr><td style="height: 20px;">Bristol Myers Squibb</td><td></td></tr> <tr><td style="height: 20px;">Eli Lilly</td><td></td></tr> <tr><td style="height: 20px;">Immagene</td><td></td></tr> <tr><td style="height: 20px;">Janssen</td><td></td></tr> <tr><td style="height: 20px;">Novartis</td><td></td></tr> <tr><td style="height: 20px;">Pfizer</td><td></td></tr> <tr><td style="height: 20px;">UCB</td><td></td></tr> <tr><td style="height: 20px;">Ventyx</td><td></td></tr> </table> | AbbVie                                                                              |  | Acelyrin |  | Amgen     |  | Bristol Myers Squibb |  | Eli Lilly |  | Immagene |  | Janssen |  | Novartis |  | Pfizer |  | UCB |  | Ventyx |  |  |
| AbbVie               |                                                                                                              |                                                                                                                                                                                                                                                                                                                                                                                                                                                                                                                                                                                                                                                                                                                                                                                                                 |                                                                                     |  |          |  |           |  |                      |  |           |  |          |  |         |  |          |  |        |  |     |  |        |  |  |
| Acelyrin             |                                                                                                              |                                                                                                                                                                                                                                                                                                                                                                                                                                                                                                                                                                                                                                                                                                                                                                                                                 |                                                                                     |  |          |  |           |  |                      |  |           |  |          |  |         |  |          |  |        |  |     |  |        |  |  |
| Amgen                |                                                                                                              |                                                                                                                                                                                                                                                                                                                                                                                                                                                                                                                                                                                                                                                                                                                                                                                                                 |                                                                                     |  |          |  |           |  |                      |  |           |  |          |  |         |  |          |  |        |  |     |  |        |  |  |
| Bristol Myers Squibb |                                                                                                              |                                                                                                                                                                                                                                                                                                                                                                                                                                                                                                                                                                                                                                                                                                                                                                                                                 |                                                                                     |  |          |  |           |  |                      |  |           |  |          |  |         |  |          |  |        |  |     |  |        |  |  |
| Eli Lilly            |                                                                                                              |                                                                                                                                                                                                                                                                                                                                                                                                                                                                                                                                                                                                                                                                                                                                                                                                                 |                                                                                     |  |          |  |           |  |                      |  |           |  |          |  |         |  |          |  |        |  |     |  |        |  |  |
| Immagene             |                                                                                                              |                                                                                                                                                                                                                                                                                                                                                                                                                                                                                                                                                                                                                                                                                                                                                                                                                 |                                                                                     |  |          |  |           |  |                      |  |           |  |          |  |         |  |          |  |        |  |     |  |        |  |  |
| Janssen              |                                                                                                              |                                                                                                                                                                                                                                                                                                                                                                                                                                                                                                                                                                                                                                                                                                                                                                                                                 |                                                                                     |  |          |  |           |  |                      |  |           |  |          |  |         |  |          |  |        |  |     |  |        |  |  |
| Novartis             |                                                                                                              |                                                                                                                                                                                                                                                                                                                                                                                                                                                                                                                                                                                                                                                                                                                                                                                                                 |                                                                                     |  |          |  |           |  |                      |  |           |  |          |  |         |  |          |  |        |  |     |  |        |  |  |
| Pfizer               |                                                                                                              |                                                                                                                                                                                                                                                                                                                                                                                                                                                                                                                                                                                                                                                                                                                                                                                                                 |                                                                                     |  |          |  |           |  |                      |  |           |  |          |  |         |  |          |  |        |  |     |  |        |  |  |
| UCB                  |                                                                                                              |                                                                                                                                                                                                                                                                                                                                                                                                                                                                                                                                                                                                                                                                                                                                                                                                                 |                                                                                     |  |          |  |           |  |                      |  |           |  |          |  |         |  |          |  |        |  |     |  |        |  |  |
| Ventyx               |                                                                                                              |                                                                                                                                                                                                                                                                                                                                                                                                                                                                                                                                                                                                                                                                                                                                                                                                                 |                                                                                     |  |          |  |           |  |                      |  |           |  |          |  |         |  |          |  |        |  |     |  |        |  |  |
| <b>5</b>             | Payment or honoraria for lectures, presentations, speakers bureaus, manuscript writing or educational events | <input type="checkbox"/> <b>None</b><br><table border="1" style="width: 100%; border-collapse: collapse;"> <tr><td style="width: 50%; height: 20px;">AbbVie</td><td style="width: 50%;"></td></tr> <tr><td style="height: 20px;">Amgen</td><td></td></tr> <tr><td style="height: 20px;">Eli Lilly</td><td></td></tr> <tr><td style="height: 20px;">Janssen</td><td></td></tr> <tr><td style="height: 20px;">Novartis</td><td></td></tr> <tr><td style="height: 20px;">Pfizer</td><td></td></tr> <tr><td style="height: 20px;">UCB</td><td></td></tr> </table>                                                                                                                                                                                                                                                   | AbbVie                                                                              |  | Amgen    |  | Eli Lilly |  | Janssen              |  | Novartis  |  | Pfizer   |  | UCB     |  |          |  |        |  |     |  |        |  |  |
| AbbVie               |                                                                                                              |                                                                                                                                                                                                                                                                                                                                                                                                                                                                                                                                                                                                                                                                                                                                                                                                                 |                                                                                     |  |          |  |           |  |                      |  |           |  |          |  |         |  |          |  |        |  |     |  |        |  |  |
| Amgen                |                                                                                                              |                                                                                                                                                                                                                                                                                                                                                                                                                                                                                                                                                                                                                                                                                                                                                                                                                 |                                                                                     |  |          |  |           |  |                      |  |           |  |          |  |         |  |          |  |        |  |     |  |        |  |  |
| Eli Lilly            |                                                                                                              |                                                                                                                                                                                                                                                                                                                                                                                                                                                                                                                                                                                                                                                                                                                                                                                                                 |                                                                                     |  |          |  |           |  |                      |  |           |  |          |  |         |  |          |  |        |  |     |  |        |  |  |
| Janssen              |                                                                                                              |                                                                                                                                                                                                                                                                                                                                                                                                                                                                                                                                                                                                                                                                                                                                                                                                                 |                                                                                     |  |          |  |           |  |                      |  |           |  |          |  |         |  |          |  |        |  |     |  |        |  |  |
| Novartis             |                                                                                                              |                                                                                                                                                                                                                                                                                                                                                                                                                                                                                                                                                                                                                                                                                                                                                                                                                 |                                                                                     |  |          |  |           |  |                      |  |           |  |          |  |         |  |          |  |        |  |     |  |        |  |  |
| Pfizer               |                                                                                                              |                                                                                                                                                                                                                                                                                                                                                                                                                                                                                                                                                                                                                                                                                                                                                                                                                 |                                                                                     |  |          |  |           |  |                      |  |           |  |          |  |         |  |          |  |        |  |     |  |        |  |  |
| UCB                  |                                                                                                              |                                                                                                                                                                                                                                                                                                                                                                                                                                                                                                                                                                                                                                                                                                                                                                                                                 |                                                                                     |  |          |  |           |  |                      |  |           |  |          |  |         |  |          |  |        |  |     |  |        |  |  |
| <b>6</b>             | Payment for expert testimony                                                                                 | <input checked="" type="checkbox"/> <b>None</b><br><table border="1" style="width: 100%; border-collapse: collapse;"> <tr><td style="width: 50%; height: 20px;"></td><td style="width: 50%;"></td></tr> <tr><td style="height: 20px;"></td><td></td></tr> <tr><td style="height: 20px;"></td><td></td></tr> </table>                                                                                                                                                                                                                                                                                                                                                                                                                                                                                            |                                                                                     |  |          |  |           |  |                      |  |           |  |          |  |         |  |          |  |        |  |     |  |        |  |  |
|                      |                                                                                                              |                                                                                                                                                                                                                                                                                                                                                                                                                                                                                                                                                                                                                                                                                                                                                                                                                 |                                                                                     |  |          |  |           |  |                      |  |           |  |          |  |         |  |          |  |        |  |     |  |        |  |  |
|                      |                                                                                                              |                                                                                                                                                                                                                                                                                                                                                                                                                                                                                                                                                                                                                                                                                                                                                                                                                 |                                                                                     |  |          |  |           |  |                      |  |           |  |          |  |         |  |          |  |        |  |     |  |        |  |  |
|                      |                                                                                                              |                                                                                                                                                                                                                                                                                                                                                                                                                                                                                                                                                                                                                                                                                                                                                                                                                 |                                                                                     |  |          |  |           |  |                      |  |           |  |          |  |         |  |          |  |        |  |     |  |        |  |  |
| <b>7</b>             | Support for attending meetings and/or travel                                                                 | <input checked="" type="checkbox"/> <b>None</b><br><table border="1" style="width: 100%; border-collapse: collapse;"> <tr><td style="width: 50%; height: 20px;"></td><td style="width: 50%;"></td></tr> <tr><td style="height: 20px;"></td><td></td></tr> <tr><td style="height: 20px;"></td><td></td></tr> </table>                                                                                                                                                                                                                                                                                                                                                                                                                                                                                            |                                                                                     |  |          |  |           |  |                      |  |           |  |          |  |         |  |          |  |        |  |     |  |        |  |  |
|                      |                                                                                                              |                                                                                                                                                                                                                                                                                                                                                                                                                                                                                                                                                                                                                                                                                                                                                                                                                 |                                                                                     |  |          |  |           |  |                      |  |           |  |          |  |         |  |          |  |        |  |     |  |        |  |  |
|                      |                                                                                                              |                                                                                                                                                                                                                                                                                                                                                                                                                                                                                                                                                                                                                                                                                                                                                                                                                 |                                                                                     |  |          |  |           |  |                      |  |           |  |          |  |         |  |          |  |        |  |     |  |        |  |  |
|                      |                                                                                                              |                                                                                                                                                                                                                                                                                                                                                                                                                                                                                                                                                                                                                                                                                                                                                                                                                 |                                                                                     |  |          |  |           |  |                      |  |           |  |          |  |         |  |          |  |        |  |     |  |        |  |  |
| <b>8</b>             | Patents planned, issued or pending                                                                           | <input checked="" type="checkbox"/> <b>None</b><br><table border="1" style="width: 100%; border-collapse: collapse;"> <tr><td style="width: 50%; height: 20px;"></td><td style="width: 50%;"></td></tr> <tr><td style="height: 20px;"></td><td></td></tr> <tr><td style="height: 20px;"></td><td></td></tr> </table>                                                                                                                                                                                                                                                                                                                                                                                                                                                                                            |                                                                                     |  |          |  |           |  |                      |  |           |  |          |  |         |  |          |  |        |  |     |  |        |  |  |
|                      |                                                                                                              |                                                                                                                                                                                                                                                                                                                                                                                                                                                                                                                                                                                                                                                                                                                                                                                                                 |                                                                                     |  |          |  |           |  |                      |  |           |  |          |  |         |  |          |  |        |  |     |  |        |  |  |
|                      |                                                                                                              |                                                                                                                                                                                                                                                                                                                                                                                                                                                                                                                                                                                                                                                                                                                                                                                                                 |                                                                                     |  |          |  |           |  |                      |  |           |  |          |  |         |  |          |  |        |  |     |  |        |  |  |
|                      |                                                                                                              |                                                                                                                                                                                                                                                                                                                                                                                                                                                                                                                                                                                                                                                                                                                                                                                                                 |                                                                                     |  |          |  |           |  |                      |  |           |  |          |  |         |  |          |  |        |  |     |  |        |  |  |
| <b>9</b>             | Participation on a Data Safety                                                                               | <input checked="" type="checkbox"/> <b>None</b>                                                                                                                                                                                                                                                                                                                                                                                                                                                                                                                                                                                                                                                                                                                                                                 |                                                                                     |  |          |  |           |  |                      |  |           |  |          |  |         |  |          |  |        |  |     |  |        |  |  |

|           |                                                                                                   | Name all entities with whom you have this relationship or indicate none (add rows as needed) | Specifications/Comments (e.g., if payments were made to you or to your institution) |
|-----------|---------------------------------------------------------------------------------------------------|----------------------------------------------------------------------------------------------|-------------------------------------------------------------------------------------|
|           | Monitoring Board or Advisory Board                                                                | <input type="text"/>                                                                         | <input type="text"/>                                                                |
|           |                                                                                                   | <input type="text"/>                                                                         | <input type="text"/>                                                                |
|           |                                                                                                   | <input type="text"/>                                                                         | <input type="text"/>                                                                |
| <b>10</b> | Leadership or fiduciary role in other board, society, committee or advocacy group, paid or unpaid | <input checked="" type="checkbox"/> <b>None</b>                                              |                                                                                     |
|           |                                                                                                   | <input type="text"/>                                                                         | <input type="text"/>                                                                |
|           |                                                                                                   | <input type="text"/>                                                                         | <input type="text"/>                                                                |
|           |                                                                                                   | <input type="text"/>                                                                         | <input type="text"/>                                                                |
| <b>11</b> | Stock or stock options                                                                            | <input checked="" type="checkbox"/> <b>None</b>                                              |                                                                                     |
|           |                                                                                                   | <input type="text"/>                                                                         | <input type="text"/>                                                                |
|           |                                                                                                   | <input type="text"/>                                                                         | <input type="text"/>                                                                |
|           |                                                                                                   | <input type="text"/>                                                                         | <input type="text"/>                                                                |
| <b>12</b> | Receipt of equipment, materials, drugs, medical writing, gifts or other services                  | <input checked="" type="checkbox"/> <b>None</b>                                              |                                                                                     |
|           |                                                                                                   | <input type="text"/>                                                                         | <input type="text"/>                                                                |
|           |                                                                                                   | <input type="text"/>                                                                         | <input type="text"/>                                                                |
|           |                                                                                                   | <input type="text"/>                                                                         | <input type="text"/>                                                                |
| <b>13</b> | Other financial or non-financial interests                                                        | <input checked="" type="checkbox"/> <b>None</b>                                              |                                                                                     |
|           |                                                                                                   | <input type="text"/>                                                                         | <input type="text"/>                                                                |
|           |                                                                                                   | <input type="text"/>                                                                         | <input type="text"/>                                                                |
|           |                                                                                                   | <input type="text"/>                                                                         | <input type="text"/>                                                                |

Please place an "X" next to the following statement to indicate your agreement:

I certify that I have answered every question and have not altered the wording of any of the questions on this form.

## ICMJE DISCLOSURE FORM

**Date:** 7/19/2024

**Your Name:** Iain B McInnes

**Manuscript Title:** Persistent Patient-Level Effect of Guselkumab at Consecutive 8-Week Dosing Visits and Over Time in Patients with Active Psoriatic Arthritis: Post hoc Analysis of a 2-year, Phase 3 Randomized, Controlled Study

**Manuscript Number (if known):** ACROR-24-063.R1

In the interest of transparency, we ask you to disclose all relationships/activities/interests listed below that are related to the content of your manuscript. "Related" means any relation with for-profit or not-for-profit third parties whose interests may be affected by the content of the manuscript. Disclosure represents a commitment to transparency and does not necessarily indicate a bias. If you are in doubt about whether to list a relationship/activity/interest, it is preferable that you do so.

The author's relationships/activities/interests should be defined broadly. For example, if your manuscript pertains to the epidemiology of hypertension, you should declare all relationships with manufacturers of antihypertensive medication, even if that medication is not mentioned in the manuscript.

In item #1 below, report all support for the work reported in this manuscript without time limit. For all other items, the time frame for disclosure is the past 36 months.

|                                                    | Name all entities with whom you have this relationship or indicate none (add rows as needed)                                                                                   | Specifications/Comments (e.g., if payments were made to you or to your institution)                                                                                                                                                                                                                                                                                                                                                                                                                                                                                                           |                                               |  |                     |  |                                           |  |                  |  |                          |  |                |  |                 |  |              |  |            |  |
|----------------------------------------------------|--------------------------------------------------------------------------------------------------------------------------------------------------------------------------------|-----------------------------------------------------------------------------------------------------------------------------------------------------------------------------------------------------------------------------------------------------------------------------------------------------------------------------------------------------------------------------------------------------------------------------------------------------------------------------------------------------------------------------------------------------------------------------------------------|-----------------------------------------------|--|---------------------|--|-------------------------------------------|--|------------------|--|--------------------------|--|----------------|--|-----------------|--|--------------|--|------------|--|
| Time frame: Since the initial planning of the work |                                                                                                                                                                                |                                                                                                                                                                                                                                                                                                                                                                                                                                                                                                                                                                                               |                                               |  |                     |  |                                           |  |                  |  |                          |  |                |  |                 |  |              |  |            |  |
| <b>1</b>                                           | All support for the present manuscript (e.g., funding, provision of study materials, medical writing, article processing charges, etc.)<br><b>No time limit for this item.</b> | <input type="checkbox"/> <b>None</b><br><table border="1" style="width: 100%; border-collapse: collapse; margin-top: 5px;"> <tr> <td style="width: 80%;"><u>Janssen Research and Development, LLC.</u></td> <td style="width: 20%;"></td> </tr> <tr> <td> </td> <td> </td> </tr> <tr> <td colspan="2" style="text-align: right; font-size: small; color: gray;">Click the tab key to add additional rows.</td> </tr> </table>                                                                                                                                                                 | <u>Janssen Research and Development, LLC.</u> |  |                     |  | Click the tab key to add additional rows. |  |                  |  |                          |  |                |  |                 |  |              |  |            |  |
| <u>Janssen Research and Development, LLC.</u>      |                                                                                                                                                                                |                                                                                                                                                                                                                                                                                                                                                                                                                                                                                                                                                                                               |                                               |  |                     |  |                                           |  |                  |  |                          |  |                |  |                 |  |              |  |            |  |
|                                                    |                                                                                                                                                                                |                                                                                                                                                                                                                                                                                                                                                                                                                                                                                                                                                                                               |                                               |  |                     |  |                                           |  |                  |  |                          |  |                |  |                 |  |              |  |            |  |
| Click the tab key to add additional rows.          |                                                                                                                                                                                |                                                                                                                                                                                                                                                                                                                                                                                                                                                                                                                                                                                               |                                               |  |                     |  |                                           |  |                  |  |                          |  |                |  |                 |  |              |  |            |  |
| Time frame: past 36 months                         |                                                                                                                                                                                |                                                                                                                                                                                                                                                                                                                                                                                                                                                                                                                                                                                               |                                               |  |                     |  |                                           |  |                  |  |                          |  |                |  |                 |  |              |  |            |  |
| <b>2</b>                                           | Grants or contracts from any entity (if not indicated in item #1 above).                                                                                                       | <input type="checkbox"/> <b>None</b><br><table border="1" style="width: 100%; border-collapse: collapse; margin-top: 5px;"> <tr><td style="width: 80%;"><u>Amgen</u></td><td style="width: 20%;"></td></tr> <tr><td><u>Astra Zeneca</u></td><td></td></tr> <tr><td><u>Bristol Myers Squibb</u></td><td></td></tr> <tr><td><u>Eli Lilly</u></td><td></td></tr> <tr><td><u>Glaxo Smith Kline</u></td><td></td></tr> <tr><td><u>Janssen</u></td><td></td></tr> <tr><td><u>Novartis</u></td><td></td></tr> <tr><td><u>Roche</u></td><td></td></tr> <tr><td><u>UCB</u></td><td></td></tr> </table> | <u>Amgen</u>                                  |  | <u>Astra Zeneca</u> |  | <u>Bristol Myers Squibb</u>               |  | <u>Eli Lilly</u> |  | <u>Glaxo Smith Kline</u> |  | <u>Janssen</u> |  | <u>Novartis</u> |  | <u>Roche</u> |  | <u>UCB</u> |  |
| <u>Amgen</u>                                       |                                                                                                                                                                                |                                                                                                                                                                                                                                                                                                                                                                                                                                                                                                                                                                                               |                                               |  |                     |  |                                           |  |                  |  |                          |  |                |  |                 |  |              |  |            |  |
| <u>Astra Zeneca</u>                                |                                                                                                                                                                                |                                                                                                                                                                                                                                                                                                                                                                                                                                                                                                                                                                                               |                                               |  |                     |  |                                           |  |                  |  |                          |  |                |  |                 |  |              |  |            |  |
| <u>Bristol Myers Squibb</u>                        |                                                                                                                                                                                |                                                                                                                                                                                                                                                                                                                                                                                                                                                                                                                                                                                               |                                               |  |                     |  |                                           |  |                  |  |                          |  |                |  |                 |  |              |  |            |  |
| <u>Eli Lilly</u>                                   |                                                                                                                                                                                |                                                                                                                                                                                                                                                                                                                                                                                                                                                                                                                                                                                               |                                               |  |                     |  |                                           |  |                  |  |                          |  |                |  |                 |  |              |  |            |  |
| <u>Glaxo Smith Kline</u>                           |                                                                                                                                                                                |                                                                                                                                                                                                                                                                                                                                                                                                                                                                                                                                                                                               |                                               |  |                     |  |                                           |  |                  |  |                          |  |                |  |                 |  |              |  |            |  |
| <u>Janssen</u>                                     |                                                                                                                                                                                |                                                                                                                                                                                                                                                                                                                                                                                                                                                                                                                                                                                               |                                               |  |                     |  |                                           |  |                  |  |                          |  |                |  |                 |  |              |  |            |  |
| <u>Novartis</u>                                    |                                                                                                                                                                                |                                                                                                                                                                                                                                                                                                                                                                                                                                                                                                                                                                                               |                                               |  |                     |  |                                           |  |                  |  |                          |  |                |  |                 |  |              |  |            |  |
| <u>Roche</u>                                       |                                                                                                                                                                                |                                                                                                                                                                                                                                                                                                                                                                                                                                                                                                                                                                                               |                                               |  |                     |  |                                           |  |                  |  |                          |  |                |  |                 |  |              |  |            |  |
| <u>UCB</u>                                         |                                                                                                                                                                                |                                                                                                                                                                                                                                                                                                                                                                                                                                                                                                                                                                                               |                                               |  |                     |  |                                           |  |                  |  |                          |  |                |  |                 |  |              |  |            |  |

|                      |                                                                                                              | Name all entities with whom you have this relationship or indicate none (add rows as needed)                                                                                                                                                                                                                                                                                                                                                                                                                                                                                                                                                                                                                                                                                                                                                                                                                                                                                                                                                                     | Specifications/Comments (e.g., if payments were made to you or to your institution) |  |       |  |              |  |                      |  |           |  |          |  |           |  |        |  |                   |  |         |  |          |  |        |  |       |  |        |  |     |  |  |
|----------------------|--------------------------------------------------------------------------------------------------------------|------------------------------------------------------------------------------------------------------------------------------------------------------------------------------------------------------------------------------------------------------------------------------------------------------------------------------------------------------------------------------------------------------------------------------------------------------------------------------------------------------------------------------------------------------------------------------------------------------------------------------------------------------------------------------------------------------------------------------------------------------------------------------------------------------------------------------------------------------------------------------------------------------------------------------------------------------------------------------------------------------------------------------------------------------------------|-------------------------------------------------------------------------------------|--|-------|--|--------------|--|----------------------|--|-----------|--|----------|--|-----------|--|--------|--|-------------------|--|---------|--|----------|--|--------|--|-------|--|--------|--|-----|--|--|
| 3                    | Royalties or licenses                                                                                        | <input checked="" type="checkbox"/> <b>None</b><br><table border="1" style="width: 100%; border-collapse: collapse;"> <tr><td style="width: 50%; height: 20px;"></td><td style="width: 50%;"></td></tr> <tr><td style="height: 20px;"></td><td></td></tr> <tr><td style="height: 20px;"></td><td></td></tr> </table>                                                                                                                                                                                                                                                                                                                                                                                                                                                                                                                                                                                                                                                                                                                                             |                                                                                     |  |       |  |              |  |                      |  |           |  |          |  |           |  |        |  |                   |  |         |  |          |  |        |  |       |  |        |  |     |  |  |
|                      |                                                                                                              |                                                                                                                                                                                                                                                                                                                                                                                                                                                                                                                                                                                                                                                                                                                                                                                                                                                                                                                                                                                                                                                                  |                                                                                     |  |       |  |              |  |                      |  |           |  |          |  |           |  |        |  |                   |  |         |  |          |  |        |  |       |  |        |  |     |  |  |
|                      |                                                                                                              |                                                                                                                                                                                                                                                                                                                                                                                                                                                                                                                                                                                                                                                                                                                                                                                                                                                                                                                                                                                                                                                                  |                                                                                     |  |       |  |              |  |                      |  |           |  |          |  |           |  |        |  |                   |  |         |  |          |  |        |  |       |  |        |  |     |  |  |
|                      |                                                                                                              |                                                                                                                                                                                                                                                                                                                                                                                                                                                                                                                                                                                                                                                                                                                                                                                                                                                                                                                                                                                                                                                                  |                                                                                     |  |       |  |              |  |                      |  |           |  |          |  |           |  |        |  |                   |  |         |  |          |  |        |  |       |  |        |  |     |  |  |
| 4                    | Consulting fees                                                                                              | <input type="checkbox"/> <b>None</b><br><table border="1" style="width: 100%; border-collapse: collapse;"> <tr><td style="width: 50%; height: 20px;">AbbVie</td><td style="width: 50%;"></td></tr> <tr><td style="height: 20px;">Amgen</td><td></td></tr> <tr><td style="height: 20px;">Astra Zeneca</td><td></td></tr> <tr><td style="height: 20px;">Bristol Myers Squibb</td><td></td></tr> <tr><td style="height: 20px;">Cabaletta</td><td></td></tr> <tr><td style="height: 20px;">Compugen</td><td></td></tr> <tr><td style="height: 20px;">Eli Lilly</td><td></td></tr> <tr><td style="height: 20px;">Gilead</td><td></td></tr> <tr><td style="height: 20px;">Glaxo Smith Kline</td><td></td></tr> <tr><td style="height: 20px;">Janssen</td><td></td></tr> <tr><td style="height: 20px;">Novartis</td><td></td></tr> <tr><td style="height: 20px;">Pfizer</td><td></td></tr> <tr><td style="height: 20px;">Roche</td><td></td></tr> <tr><td style="height: 20px;">Sanofi</td><td></td></tr> <tr><td style="height: 20px;">UCB</td><td></td></tr> </table> | AbbVie                                                                              |  | Amgen |  | Astra Zeneca |  | Bristol Myers Squibb |  | Cabaletta |  | Compugen |  | Eli Lilly |  | Gilead |  | Glaxo Smith Kline |  | Janssen |  | Novartis |  | Pfizer |  | Roche |  | Sanofi |  | UCB |  |  |
| AbbVie               |                                                                                                              |                                                                                                                                                                                                                                                                                                                                                                                                                                                                                                                                                                                                                                                                                                                                                                                                                                                                                                                                                                                                                                                                  |                                                                                     |  |       |  |              |  |                      |  |           |  |          |  |           |  |        |  |                   |  |         |  |          |  |        |  |       |  |        |  |     |  |  |
| Amgen                |                                                                                                              |                                                                                                                                                                                                                                                                                                                                                                                                                                                                                                                                                                                                                                                                                                                                                                                                                                                                                                                                                                                                                                                                  |                                                                                     |  |       |  |              |  |                      |  |           |  |          |  |           |  |        |  |                   |  |         |  |          |  |        |  |       |  |        |  |     |  |  |
| Astra Zeneca         |                                                                                                              |                                                                                                                                                                                                                                                                                                                                                                                                                                                                                                                                                                                                                                                                                                                                                                                                                                                                                                                                                                                                                                                                  |                                                                                     |  |       |  |              |  |                      |  |           |  |          |  |           |  |        |  |                   |  |         |  |          |  |        |  |       |  |        |  |     |  |  |
| Bristol Myers Squibb |                                                                                                              |                                                                                                                                                                                                                                                                                                                                                                                                                                                                                                                                                                                                                                                                                                                                                                                                                                                                                                                                                                                                                                                                  |                                                                                     |  |       |  |              |  |                      |  |           |  |          |  |           |  |        |  |                   |  |         |  |          |  |        |  |       |  |        |  |     |  |  |
| Cabaletta            |                                                                                                              |                                                                                                                                                                                                                                                                                                                                                                                                                                                                                                                                                                                                                                                                                                                                                                                                                                                                                                                                                                                                                                                                  |                                                                                     |  |       |  |              |  |                      |  |           |  |          |  |           |  |        |  |                   |  |         |  |          |  |        |  |       |  |        |  |     |  |  |
| Compugen             |                                                                                                              |                                                                                                                                                                                                                                                                                                                                                                                                                                                                                                                                                                                                                                                                                                                                                                                                                                                                                                                                                                                                                                                                  |                                                                                     |  |       |  |              |  |                      |  |           |  |          |  |           |  |        |  |                   |  |         |  |          |  |        |  |       |  |        |  |     |  |  |
| Eli Lilly            |                                                                                                              |                                                                                                                                                                                                                                                                                                                                                                                                                                                                                                                                                                                                                                                                                                                                                                                                                                                                                                                                                                                                                                                                  |                                                                                     |  |       |  |              |  |                      |  |           |  |          |  |           |  |        |  |                   |  |         |  |          |  |        |  |       |  |        |  |     |  |  |
| Gilead               |                                                                                                              |                                                                                                                                                                                                                                                                                                                                                                                                                                                                                                                                                                                                                                                                                                                                                                                                                                                                                                                                                                                                                                                                  |                                                                                     |  |       |  |              |  |                      |  |           |  |          |  |           |  |        |  |                   |  |         |  |          |  |        |  |       |  |        |  |     |  |  |
| Glaxo Smith Kline    |                                                                                                              |                                                                                                                                                                                                                                                                                                                                                                                                                                                                                                                                                                                                                                                                                                                                                                                                                                                                                                                                                                                                                                                                  |                                                                                     |  |       |  |              |  |                      |  |           |  |          |  |           |  |        |  |                   |  |         |  |          |  |        |  |       |  |        |  |     |  |  |
| Janssen              |                                                                                                              |                                                                                                                                                                                                                                                                                                                                                                                                                                                                                                                                                                                                                                                                                                                                                                                                                                                                                                                                                                                                                                                                  |                                                                                     |  |       |  |              |  |                      |  |           |  |          |  |           |  |        |  |                   |  |         |  |          |  |        |  |       |  |        |  |     |  |  |
| Novartis             |                                                                                                              |                                                                                                                                                                                                                                                                                                                                                                                                                                                                                                                                                                                                                                                                                                                                                                                                                                                                                                                                                                                                                                                                  |                                                                                     |  |       |  |              |  |                      |  |           |  |          |  |           |  |        |  |                   |  |         |  |          |  |        |  |       |  |        |  |     |  |  |
| Pfizer               |                                                                                                              |                                                                                                                                                                                                                                                                                                                                                                                                                                                                                                                                                                                                                                                                                                                                                                                                                                                                                                                                                                                                                                                                  |                                                                                     |  |       |  |              |  |                      |  |           |  |          |  |           |  |        |  |                   |  |         |  |          |  |        |  |       |  |        |  |     |  |  |
| Roche                |                                                                                                              |                                                                                                                                                                                                                                                                                                                                                                                                                                                                                                                                                                                                                                                                                                                                                                                                                                                                                                                                                                                                                                                                  |                                                                                     |  |       |  |              |  |                      |  |           |  |          |  |           |  |        |  |                   |  |         |  |          |  |        |  |       |  |        |  |     |  |  |
| Sanofi               |                                                                                                              |                                                                                                                                                                                                                                                                                                                                                                                                                                                                                                                                                                                                                                                                                                                                                                                                                                                                                                                                                                                                                                                                  |                                                                                     |  |       |  |              |  |                      |  |           |  |          |  |           |  |        |  |                   |  |         |  |          |  |        |  |       |  |        |  |     |  |  |
| UCB                  |                                                                                                              |                                                                                                                                                                                                                                                                                                                                                                                                                                                                                                                                                                                                                                                                                                                                                                                                                                                                                                                                                                                                                                                                  |                                                                                     |  |       |  |              |  |                      |  |           |  |          |  |           |  |        |  |                   |  |         |  |          |  |        |  |       |  |        |  |     |  |  |
| 5                    | Payment or honoraria for lectures, presentations, speakers bureaus, manuscript writing or educational events | <input checked="" type="checkbox"/> <b>None</b><br><table border="1" style="width: 100%; border-collapse: collapse;"> <tr><td style="width: 50%; height: 20px;"></td><td style="width: 50%;"></td></tr> <tr><td style="height: 20px;"></td><td></td></tr> <tr><td style="height: 20px;"></td><td></td></tr> </table>                                                                                                                                                                                                                                                                                                                                                                                                                                                                                                                                                                                                                                                                                                                                             |                                                                                     |  |       |  |              |  |                      |  |           |  |          |  |           |  |        |  |                   |  |         |  |          |  |        |  |       |  |        |  |     |  |  |
|                      |                                                                                                              |                                                                                                                                                                                                                                                                                                                                                                                                                                                                                                                                                                                                                                                                                                                                                                                                                                                                                                                                                                                                                                                                  |                                                                                     |  |       |  |              |  |                      |  |           |  |          |  |           |  |        |  |                   |  |         |  |          |  |        |  |       |  |        |  |     |  |  |
|                      |                                                                                                              |                                                                                                                                                                                                                                                                                                                                                                                                                                                                                                                                                                                                                                                                                                                                                                                                                                                                                                                                                                                                                                                                  |                                                                                     |  |       |  |              |  |                      |  |           |  |          |  |           |  |        |  |                   |  |         |  |          |  |        |  |       |  |        |  |     |  |  |
|                      |                                                                                                              |                                                                                                                                                                                                                                                                                                                                                                                                                                                                                                                                                                                                                                                                                                                                                                                                                                                                                                                                                                                                                                                                  |                                                                                     |  |       |  |              |  |                      |  |           |  |          |  |           |  |        |  |                   |  |         |  |          |  |        |  |       |  |        |  |     |  |  |
| 6                    | Payment for expert testimony                                                                                 | <input checked="" type="checkbox"/> <b>None</b><br><table border="1" style="width: 100%; border-collapse: collapse;"> <tr><td style="width: 50%; height: 20px;"></td><td style="width: 50%;"></td></tr> <tr><td style="height: 20px;"></td><td></td></tr> <tr><td style="height: 20px;"></td><td></td></tr> </table>                                                                                                                                                                                                                                                                                                                                                                                                                                                                                                                                                                                                                                                                                                                                             |                                                                                     |  |       |  |              |  |                      |  |           |  |          |  |           |  |        |  |                   |  |         |  |          |  |        |  |       |  |        |  |     |  |  |
|                      |                                                                                                              |                                                                                                                                                                                                                                                                                                                                                                                                                                                                                                                                                                                                                                                                                                                                                                                                                                                                                                                                                                                                                                                                  |                                                                                     |  |       |  |              |  |                      |  |           |  |          |  |           |  |        |  |                   |  |         |  |          |  |        |  |       |  |        |  |     |  |  |
|                      |                                                                                                              |                                                                                                                                                                                                                                                                                                                                                                                                                                                                                                                                                                                                                                                                                                                                                                                                                                                                                                                                                                                                                                                                  |                                                                                     |  |       |  |              |  |                      |  |           |  |          |  |           |  |        |  |                   |  |         |  |          |  |        |  |       |  |        |  |     |  |  |
|                      |                                                                                                              |                                                                                                                                                                                                                                                                                                                                                                                                                                                                                                                                                                                                                                                                                                                                                                                                                                                                                                                                                                                                                                                                  |                                                                                     |  |       |  |              |  |                      |  |           |  |          |  |           |  |        |  |                   |  |         |  |          |  |        |  |       |  |        |  |     |  |  |
| 7                    | Support for attending meetings and/or travel                                                                 | <input checked="" type="checkbox"/> <b>None</b><br><table border="1" style="width: 100%; border-collapse: collapse;"> <tr><td style="width: 50%; height: 20px;"></td><td style="width: 50%;"></td></tr> <tr><td style="height: 20px;"></td><td></td></tr> <tr><td style="height: 20px;"></td><td></td></tr> </table>                                                                                                                                                                                                                                                                                                                                                                                                                                                                                                                                                                                                                                                                                                                                             |                                                                                     |  |       |  |              |  |                      |  |           |  |          |  |           |  |        |  |                   |  |         |  |          |  |        |  |       |  |        |  |     |  |  |
|                      |                                                                                                              |                                                                                                                                                                                                                                                                                                                                                                                                                                                                                                                                                                                                                                                                                                                                                                                                                                                                                                                                                                                                                                                                  |                                                                                     |  |       |  |              |  |                      |  |           |  |          |  |           |  |        |  |                   |  |         |  |          |  |        |  |       |  |        |  |     |  |  |
|                      |                                                                                                              |                                                                                                                                                                                                                                                                                                                                                                                                                                                                                                                                                                                                                                                                                                                                                                                                                                                                                                                                                                                                                                                                  |                                                                                     |  |       |  |              |  |                      |  |           |  |          |  |           |  |        |  |                   |  |         |  |          |  |        |  |       |  |        |  |     |  |  |
|                      |                                                                                                              |                                                                                                                                                                                                                                                                                                                                                                                                                                                                                                                                                                                                                                                                                                                                                                                                                                                                                                                                                                                                                                                                  |                                                                                     |  |       |  |              |  |                      |  |           |  |          |  |           |  |        |  |                   |  |         |  |          |  |        |  |       |  |        |  |     |  |  |

|    |                                                                                                   | Name all entities with whom you have this relationship or indicate none (add rows as needed) | Specifications/Comments (e.g., if payments were made to you or to your institution) |
|----|---------------------------------------------------------------------------------------------------|----------------------------------------------------------------------------------------------|-------------------------------------------------------------------------------------|
| 8  | Patents planned, issued or pending                                                                | <input checked="" type="checkbox"/> None                                                     |                                                                                     |
|    |                                                                                                   |                                                                                              |                                                                                     |
|    |                                                                                                   |                                                                                              |                                                                                     |
| 9  | Participation on a Data Safety Monitoring Board or Advisory Board                                 | <input checked="" type="checkbox"/> None                                                     |                                                                                     |
|    |                                                                                                   |                                                                                              |                                                                                     |
|    |                                                                                                   |                                                                                              |                                                                                     |
| 10 | Leadership or fiduciary role in other board, society, committee or advocacy group, paid or unpaid | <input checked="" type="checkbox"/> None                                                     |                                                                                     |
|    |                                                                                                   |                                                                                              |                                                                                     |
|    |                                                                                                   |                                                                                              |                                                                                     |
| 11 | Stock or stock options                                                                            | <input type="checkbox"/> None                                                                |                                                                                     |
|    |                                                                                                   | Causeway and Evelo Compugen                                                                  | Shareholder                                                                         |
|    |                                                                                                   | NHSGGC Board Member                                                                          | Shareholder                                                                         |
|    |                                                                                                   | Evelo Board of Directors                                                                     | Shareholder                                                                         |
|    |                                                                                                   | Versus Arthritis Trustee                                                                     | Shareholder                                                                         |
| 12 | Receipt of equipment, materials, drugs, medical writing, gifts or other services                  | <input checked="" type="checkbox"/> None                                                     |                                                                                     |
|    |                                                                                                   |                                                                                              |                                                                                     |
|    |                                                                                                   |                                                                                              |                                                                                     |
| 13 | Other financial or non-financial interests                                                        | <input checked="" type="checkbox"/> None                                                     |                                                                                     |
|    |                                                                                                   |                                                                                              |                                                                                     |
|    |                                                                                                   |                                                                                              |                                                                                     |

Please place an "X" next to the following statement to indicate your agreement:

I certify that I have answered every question and have not altered the wording of any of the questions on this form.



# ICMJE DISCLOSURE FORM

**Date:** 7/18/2024

**Your Name:** Atul Deodhar

**Manuscript Title:** Persistent Patient-Level Effect of Guselkumab at Consecutive 8-Week Dosing Visits and Over Time in Patients with Active Psoriatic Arthritis: Post hoc Analysis of a 2-year, Phase 3 Randomized, Controlled Study

**Manuscript Number (if known):** ACROR-24-063.R1

In the interest of transparency, we ask you to disclose all relationships/activities/interests listed below that are related to the content of your manuscript. "Related" means any relation with for-profit or not-for-profit third parties whose interests may be affected by the content of the manuscript. Disclosure represents a commitment to transparency and does not necessarily indicate a bias. If you are in doubt about whether to list a relationship/activity/interest, it is preferable that you do so.

The author's relationships/activities/interests should be defined broadly. For example, if your manuscript pertains to the epidemiology of hypertension, you should declare all relationships with manufacturers of antihypertensive medication, even if that medication is not mentioned in the manuscript.

In item #1 below, report all support for the work reported in this manuscript without time limit. For all other items, the time frame for disclosure is the past 36 months.

|                                                    | Name all entities with whom you have this relationship or indicate none (add rows as needed)                                                                                   | Specifications/Comments (e.g., if payments were made to you or to your institution)                                                                                                                                                                                                                                                                                                                                          |                                        |  |           |  |          |  |        |  |     |  |
|----------------------------------------------------|--------------------------------------------------------------------------------------------------------------------------------------------------------------------------------|------------------------------------------------------------------------------------------------------------------------------------------------------------------------------------------------------------------------------------------------------------------------------------------------------------------------------------------------------------------------------------------------------------------------------|----------------------------------------|--|-----------|--|----------|--|--------|--|-----|--|
| Time frame: Since the initial planning of the work |                                                                                                                                                                                |                                                                                                                                                                                                                                                                                                                                                                                                                              |                                        |  |           |  |          |  |        |  |     |  |
| <b>1</b>                                           | All support for the present manuscript (e.g., funding, provision of study materials, medical writing, article processing charges, etc.)<br><b>No time limit for this item.</b> | <input type="checkbox"/> <b>None</b><br><table border="1" style="width: 100%; border-collapse: collapse; margin-top: 5px;"> <tr> <td style="width: 80%;">Janssen Research and Development, LLC.</td> <td style="width: 20%;"></td> </tr> <tr> <td> </td> <td> </td> </tr> <tr> <td> </td> <td> </td> </tr> </table> <p style="font-size: small; color: gray; margin-top: 5px;">Click the tab key to add additional rows.</p> | Janssen Research and Development, LLC. |  |           |  |          |  |        |  |     |  |
| Janssen Research and Development, LLC.             |                                                                                                                                                                                |                                                                                                                                                                                                                                                                                                                                                                                                                              |                                        |  |           |  |          |  |        |  |     |  |
|                                                    |                                                                                                                                                                                |                                                                                                                                                                                                                                                                                                                                                                                                                              |                                        |  |           |  |          |  |        |  |     |  |
|                                                    |                                                                                                                                                                                |                                                                                                                                                                                                                                                                                                                                                                                                                              |                                        |  |           |  |          |  |        |  |     |  |
| Time frame: past 36 months                         |                                                                                                                                                                                |                                                                                                                                                                                                                                                                                                                                                                                                                              |                                        |  |           |  |          |  |        |  |     |  |
| <b>2</b>                                           | Grants or contracts from any entity (if not indicated in item #1 above).                                                                                                       | <input type="checkbox"/> <b>None</b><br><table border="1" style="width: 100%; border-collapse: collapse; margin-top: 5px;"> <tr> <td style="width: 80%;">AbbVie</td> <td style="width: 20%;"></td> </tr> <tr> <td>Eli Lilly</td> <td> </td> </tr> <tr> <td>Novartis</td> <td> </td> </tr> <tr> <td>Pfizer</td> <td> </td> </tr> <tr> <td>UCB</td> <td> </td> </tr> </table>                                                  | AbbVie                                 |  | Eli Lilly |  | Novartis |  | Pfizer |  | UCB |  |
| AbbVie                                             |                                                                                                                                                                                |                                                                                                                                                                                                                                                                                                                                                                                                                              |                                        |  |           |  |          |  |        |  |     |  |
| Eli Lilly                                          |                                                                                                                                                                                |                                                                                                                                                                                                                                                                                                                                                                                                                              |                                        |  |           |  |          |  |        |  |     |  |
| Novartis                                           |                                                                                                                                                                                |                                                                                                                                                                                                                                                                                                                                                                                                                              |                                        |  |           |  |          |  |        |  |     |  |
| Pfizer                                             |                                                                                                                                                                                |                                                                                                                                                                                                                                                                                                                                                                                                                              |                                        |  |           |  |          |  |        |  |     |  |
| UCB                                                |                                                                                                                                                                                |                                                                                                                                                                                                                                                                                                                                                                                                                              |                                        |  |           |  |          |  |        |  |     |  |
| <b>3</b>                                           | Royalties or licenses                                                                                                                                                          | <input checked="" type="checkbox"/> <b>None</b><br><table border="1" style="width: 100%; border-collapse: collapse; margin-top: 5px;"> <tr> <td style="width: 80%;"> </td> <td style="width: 20%;"> </td> </tr> <tr> <td> </td> <td> </td> </tr> <tr> <td> </td> <td> </td> </tr> </table>                                                                                                                                   |                                        |  |           |  |          |  |        |  |     |  |
|                                                    |                                                                                                                                                                                |                                                                                                                                                                                                                                                                                                                                                                                                                              |                                        |  |           |  |          |  |        |  |     |  |
|                                                    |                                                                                                                                                                                |                                                                                                                                                                                                                                                                                                                                                                                                                              |                                        |  |           |  |          |  |        |  |     |  |
|                                                    |                                                                                                                                                                                |                                                                                                                                                                                                                                                                                                                                                                                                                              |                                        |  |           |  |          |  |        |  |     |  |

|     |                                                                                                              | Name all entities with whom you have this relationship or indicate none (add rows as needed) | Specifications/Comments (e.g., if payments were made to you or to your institution) |
|-----|--------------------------------------------------------------------------------------------------------------|----------------------------------------------------------------------------------------------|-------------------------------------------------------------------------------------|
| 4   | Consulting fees                                                                                              | <input type="checkbox"/> None                                                                |                                                                                     |
|     |                                                                                                              | AbbVie                                                                                       |                                                                                     |
|     |                                                                                                              | Bristol Myers Squibb                                                                         |                                                                                     |
|     |                                                                                                              | Celgene                                                                                      |                                                                                     |
|     |                                                                                                              | Eli Lilly                                                                                    |                                                                                     |
|     |                                                                                                              | Janssen                                                                                      |                                                                                     |
|     |                                                                                                              | Novartis                                                                                     |                                                                                     |
|     |                                                                                                              | Pfizer                                                                                       |                                                                                     |
| UCB |                                                                                                              |                                                                                              |                                                                                     |
| 5   | Payment or honoraria for lectures, presentations, speakers bureaus, manuscript writing or educational events | <input type="checkbox"/> None                                                                |                                                                                     |
|     |                                                                                                              | Eli Lilly                                                                                    |                                                                                     |
|     |                                                                                                              | Janssen                                                                                      |                                                                                     |
|     |                                                                                                              | Novartis                                                                                     |                                                                                     |
|     |                                                                                                              | Pfizer                                                                                       |                                                                                     |
|     |                                                                                                              | UCB                                                                                          |                                                                                     |
| 6   | Payment for expert testimony                                                                                 | <input checked="" type="checkbox"/> None                                                     |                                                                                     |
|     |                                                                                                              |                                                                                              |                                                                                     |
|     |                                                                                                              |                                                                                              |                                                                                     |
|     |                                                                                                              |                                                                                              |                                                                                     |
| 7   | Support for attending meetings and/or travel                                                                 | <input checked="" type="checkbox"/> None                                                     |                                                                                     |
|     |                                                                                                              |                                                                                              |                                                                                     |
|     |                                                                                                              |                                                                                              |                                                                                     |
| 8   | Patents planned, issued or pending                                                                           | <input checked="" type="checkbox"/> None                                                     |                                                                                     |
|     |                                                                                                              |                                                                                              |                                                                                     |
|     |                                                                                                              |                                                                                              |                                                                                     |
| 9   | Participation on a Data Safety Monitoring Board or Advisory Board                                            | <input checked="" type="checkbox"/> None                                                     |                                                                                     |
|     |                                                                                                              |                                                                                              |                                                                                     |
|     |                                                                                                              |                                                                                              |                                                                                     |
| 10  | Leadership or fiduciary role in other board, society, committee or advocacy group, paid or unpaid            | <input checked="" type="checkbox"/> None                                                     |                                                                                     |
|     |                                                                                                              |                                                                                              |                                                                                     |
|     |                                                                                                              |                                                                                              |                                                                                     |

|           |                                                                                  | Name all entities with whom you have this relationship or indicate none (add rows as needed)                                                                                                                                                                                                                         | Specifications/Comments (e.g., if payments were made to you or to your institution) |  |  |  |  |  |  |
|-----------|----------------------------------------------------------------------------------|----------------------------------------------------------------------------------------------------------------------------------------------------------------------------------------------------------------------------------------------------------------------------------------------------------------------|-------------------------------------------------------------------------------------|--|--|--|--|--|--|
| <b>11</b> | Stock or stock options                                                           | <input checked="" type="checkbox"/> <b>None</b><br><table border="1" style="width: 100%; border-collapse: collapse;"> <tr><td style="width: 50%; height: 15px;"></td><td style="width: 50%;"></td></tr> <tr><td style="height: 15px;"></td><td></td></tr> <tr><td style="height: 15px;"></td><td></td></tr> </table> |                                                                                     |  |  |  |  |  |  |
|           |                                                                                  |                                                                                                                                                                                                                                                                                                                      |                                                                                     |  |  |  |  |  |  |
|           |                                                                                  |                                                                                                                                                                                                                                                                                                                      |                                                                                     |  |  |  |  |  |  |
|           |                                                                                  |                                                                                                                                                                                                                                                                                                                      |                                                                                     |  |  |  |  |  |  |
| <b>12</b> | Receipt of equipment, materials, drugs, medical writing, gifts or other services | <input checked="" type="checkbox"/> <b>None</b><br><table border="1" style="width: 100%; border-collapse: collapse;"> <tr><td style="width: 50%; height: 15px;"></td><td style="width: 50%;"></td></tr> <tr><td style="height: 15px;"></td><td></td></tr> <tr><td style="height: 15px;"></td><td></td></tr> </table> |                                                                                     |  |  |  |  |  |  |
|           |                                                                                  |                                                                                                                                                                                                                                                                                                                      |                                                                                     |  |  |  |  |  |  |
|           |                                                                                  |                                                                                                                                                                                                                                                                                                                      |                                                                                     |  |  |  |  |  |  |
|           |                                                                                  |                                                                                                                                                                                                                                                                                                                      |                                                                                     |  |  |  |  |  |  |
| <b>13</b> | Other financial or non-financial interests                                       | <input checked="" type="checkbox"/> <b>None</b><br><table border="1" style="width: 100%; border-collapse: collapse;"> <tr><td style="width: 50%; height: 15px;"></td><td style="width: 50%;"></td></tr> <tr><td style="height: 15px;"></td><td></td></tr> <tr><td style="height: 15px;"></td><td></td></tr> </table> |                                                                                     |  |  |  |  |  |  |
|           |                                                                                  |                                                                                                                                                                                                                                                                                                                      |                                                                                     |  |  |  |  |  |  |
|           |                                                                                  |                                                                                                                                                                                                                                                                                                                      |                                                                                     |  |  |  |  |  |  |
|           |                                                                                  |                                                                                                                                                                                                                                                                                                                      |                                                                                     |  |  |  |  |  |  |

**Please place an "X" next to the following statement to indicate your agreement:**

I certify that I have answered every question and have not altered the wording of any of the questions on this form.

## .ICMJE DISCLOSURE FORM

**Date:** 7/18/2024

**Your Name:** Vinod Chandran

**Manuscript Title:** Persistent Patient-Level Effect of Guselkumab at Consecutive 8-Week Dosing Visits and Over Time in Patients with Active Psoriatic Arthritis: Post hoc Analysis of a 2-year, Phase 3 Randomized, Controlled Study

**Manuscript Number (if known):** ACROR-24-063.R1

In the interest of transparency, we ask you to disclose all relationships/activities/interests listed below that are related to the content of your manuscript. "Related" means any relation with for-profit or not-for-profit third parties whose interests may be affected by the content of the manuscript. Disclosure represents a commitment to transparency and does not necessarily indicate a bias. If you are in doubt about whether to list a relationship/activity/interest, it is preferable that you do so.

The author's relationships/activities/interests should be defined broadly. For example, if your manuscript pertains to the epidemiology of hypertension, you should declare all relationships with manufacturers of antihypertensive medication, even if that medication is not mentioned in the manuscript.

In item #1 below, report all support for the work reported in this manuscript without time limit. For all other items, the time frame for disclosure is the past 36 months.

|                                                    | Name all entities with whom you have this relationship or indicate none (add rows as needed)                                                                                   | Specifications/Comments (e.g., if payments were made to you or to your institution)                                                                                                                                                                                                                                                                                                                                                |                                        |  |       |  |           |  |
|----------------------------------------------------|--------------------------------------------------------------------------------------------------------------------------------------------------------------------------------|------------------------------------------------------------------------------------------------------------------------------------------------------------------------------------------------------------------------------------------------------------------------------------------------------------------------------------------------------------------------------------------------------------------------------------|----------------------------------------|--|-------|--|-----------|--|
| Time frame: Since the initial planning of the work |                                                                                                                                                                                |                                                                                                                                                                                                                                                                                                                                                                                                                                    |                                        |  |       |  |           |  |
| <b>1</b>                                           | All support for the present manuscript (e.g., funding, provision of study materials, medical writing, article processing charges, etc.)<br><b>No time limit for this item.</b> | <input type="checkbox"/> <b>None</b><br><table border="1" style="width: 100%; border-collapse: collapse; margin-top: 5px;"> <tr> <td style="width: 80%;">Janssen Research and Development, LLC.</td> <td style="width: 20%;"></td> </tr> <tr> <td> </td> <td> </td> </tr> <tr> <td> </td> <td> </td> </tr> </table> <p style="font-size: small; text-align: right; margin-top: 5px;">Click the tab key to add additional rows.</p> | Janssen Research and Development, LLC. |  |       |  |           |  |
| Janssen Research and Development, LLC.             |                                                                                                                                                                                |                                                                                                                                                                                                                                                                                                                                                                                                                                    |                                        |  |       |  |           |  |
|                                                    |                                                                                                                                                                                |                                                                                                                                                                                                                                                                                                                                                                                                                                    |                                        |  |       |  |           |  |
|                                                    |                                                                                                                                                                                |                                                                                                                                                                                                                                                                                                                                                                                                                                    |                                        |  |       |  |           |  |
| Time frame: past 36 months                         |                                                                                                                                                                                |                                                                                                                                                                                                                                                                                                                                                                                                                                    |                                        |  |       |  |           |  |
| <b>2</b>                                           | Grants or contracts from any entity (if not indicated in item #1 above).                                                                                                       | <input type="checkbox"/> <b>None</b><br><table border="1" style="width: 100%; border-collapse: collapse; margin-top: 5px;"> <tr> <td style="width: 80%;">AbbVie</td> <td style="width: 20%;"></td> </tr> <tr> <td>Amgen</td> <td> </td> </tr> <tr> <td>Eli Lilly</td> <td> </td> </tr> </table>                                                                                                                                    | AbbVie                                 |  | Amgen |  | Eli Lilly |  |
| AbbVie                                             |                                                                                                                                                                                |                                                                                                                                                                                                                                                                                                                                                                                                                                    |                                        |  |       |  |           |  |
| Amgen                                              |                                                                                                                                                                                |                                                                                                                                                                                                                                                                                                                                                                                                                                    |                                        |  |       |  |           |  |
| Eli Lilly                                          |                                                                                                                                                                                |                                                                                                                                                                                                                                                                                                                                                                                                                                    |                                        |  |       |  |           |  |
| <b>3</b>                                           | Royalties or licenses                                                                                                                                                          | <input checked="" type="checkbox"/> <b>None</b><br><table border="1" style="width: 100%; border-collapse: collapse; margin-top: 5px;"> <tr> <td style="width: 80%;"> </td> <td style="width: 20%;"> </td> </tr> <tr> <td> </td> <td> </td> </tr> <tr> <td> </td> <td> </td> </tr> </table>                                                                                                                                         |                                        |  |       |  |           |  |
|                                                    |                                                                                                                                                                                |                                                                                                                                                                                                                                                                                                                                                                                                                                    |                                        |  |       |  |           |  |
|                                                    |                                                                                                                                                                                |                                                                                                                                                                                                                                                                                                                                                                                                                                    |                                        |  |       |  |           |  |
|                                                    |                                                                                                                                                                                |                                                                                                                                                                                                                                                                                                                                                                                                                                    |                                        |  |       |  |           |  |

|                      |                                                                                                              | Name all entities with whom you have this relationship or indicate none (add rows as needed)                                                                                                                                                                                                                                                                                                                                                                                                                                                                                                                                        | Specifications/Comments (e.g., if payments were made to you or to your institution) |  |       |  |                      |  |           |  |         |  |          |  |        |  |     |  |  |
|----------------------|--------------------------------------------------------------------------------------------------------------|-------------------------------------------------------------------------------------------------------------------------------------------------------------------------------------------------------------------------------------------------------------------------------------------------------------------------------------------------------------------------------------------------------------------------------------------------------------------------------------------------------------------------------------------------------------------------------------------------------------------------------------|-------------------------------------------------------------------------------------|--|-------|--|----------------------|--|-----------|--|---------|--|----------|--|--------|--|-----|--|--|
| 4                    | Consulting fees                                                                                              | <input checked="" type="checkbox"/> <b>None</b><br><table border="1" style="width: 100%; border-collapse: collapse;"> <tr><td style="width: 50%; height: 20px;"></td><td style="width: 50%;"></td></tr> <tr><td style="height: 20px;"></td><td></td></tr> <tr><td style="height: 20px;"></td><td></td></tr> <tr><td style="height: 20px;"></td><td></td></tr> </table>                                                                                                                                                                                                                                                              |                                                                                     |  |       |  |                      |  |           |  |         |  |          |  |        |  |     |  |  |
|                      |                                                                                                              |                                                                                                                                                                                                                                                                                                                                                                                                                                                                                                                                                                                                                                     |                                                                                     |  |       |  |                      |  |           |  |         |  |          |  |        |  |     |  |  |
|                      |                                                                                                              |                                                                                                                                                                                                                                                                                                                                                                                                                                                                                                                                                                                                                                     |                                                                                     |  |       |  |                      |  |           |  |         |  |          |  |        |  |     |  |  |
|                      |                                                                                                              |                                                                                                                                                                                                                                                                                                                                                                                                                                                                                                                                                                                                                                     |                                                                                     |  |       |  |                      |  |           |  |         |  |          |  |        |  |     |  |  |
|                      |                                                                                                              |                                                                                                                                                                                                                                                                                                                                                                                                                                                                                                                                                                                                                                     |                                                                                     |  |       |  |                      |  |           |  |         |  |          |  |        |  |     |  |  |
| 5                    | Payment or honoraria for lectures, presentations, speakers bureaus, manuscript writing or educational events | <input type="checkbox"/> <b>None</b><br><table border="1" style="width: 100%; border-collapse: collapse;"> <tr><td style="width: 50%; height: 20px;">AbbVie</td><td style="width: 50%;"></td></tr> <tr><td style="height: 20px;">Amgen</td><td></td></tr> <tr><td style="height: 20px;">Bristol Myers Squibb</td><td></td></tr> <tr><td style="height: 20px;">Eli Lilly</td><td></td></tr> <tr><td style="height: 20px;">Janssen</td><td></td></tr> <tr><td style="height: 20px;">Novartis</td><td></td></tr> <tr><td style="height: 20px;">Pfizer</td><td></td></tr> <tr><td style="height: 20px;">UCB</td><td></td></tr> </table> | AbbVie                                                                              |  | Amgen |  | Bristol Myers Squibb |  | Eli Lilly |  | Janssen |  | Novartis |  | Pfizer |  | UCB |  |  |
| AbbVie               |                                                                                                              |                                                                                                                                                                                                                                                                                                                                                                                                                                                                                                                                                                                                                                     |                                                                                     |  |       |  |                      |  |           |  |         |  |          |  |        |  |     |  |  |
| Amgen                |                                                                                                              |                                                                                                                                                                                                                                                                                                                                                                                                                                                                                                                                                                                                                                     |                                                                                     |  |       |  |                      |  |           |  |         |  |          |  |        |  |     |  |  |
| Bristol Myers Squibb |                                                                                                              |                                                                                                                                                                                                                                                                                                                                                                                                                                                                                                                                                                                                                                     |                                                                                     |  |       |  |                      |  |           |  |         |  |          |  |        |  |     |  |  |
| Eli Lilly            |                                                                                                              |                                                                                                                                                                                                                                                                                                                                                                                                                                                                                                                                                                                                                                     |                                                                                     |  |       |  |                      |  |           |  |         |  |          |  |        |  |     |  |  |
| Janssen              |                                                                                                              |                                                                                                                                                                                                                                                                                                                                                                                                                                                                                                                                                                                                                                     |                                                                                     |  |       |  |                      |  |           |  |         |  |          |  |        |  |     |  |  |
| Novartis             |                                                                                                              |                                                                                                                                                                                                                                                                                                                                                                                                                                                                                                                                                                                                                                     |                                                                                     |  |       |  |                      |  |           |  |         |  |          |  |        |  |     |  |  |
| Pfizer               |                                                                                                              |                                                                                                                                                                                                                                                                                                                                                                                                                                                                                                                                                                                                                                     |                                                                                     |  |       |  |                      |  |           |  |         |  |          |  |        |  |     |  |  |
| UCB                  |                                                                                                              |                                                                                                                                                                                                                                                                                                                                                                                                                                                                                                                                                                                                                                     |                                                                                     |  |       |  |                      |  |           |  |         |  |          |  |        |  |     |  |  |
| 6                    | Payment for expert testimony                                                                                 | <input checked="" type="checkbox"/> <b>None</b><br><table border="1" style="width: 100%; border-collapse: collapse;"> <tr><td style="width: 50%; height: 20px;"></td><td style="width: 50%;"></td></tr> <tr><td style="height: 20px;"></td><td></td></tr> <tr><td style="height: 20px;"></td><td></td></tr> </table>                                                                                                                                                                                                                                                                                                                |                                                                                     |  |       |  |                      |  |           |  |         |  |          |  |        |  |     |  |  |
|                      |                                                                                                              |                                                                                                                                                                                                                                                                                                                                                                                                                                                                                                                                                                                                                                     |                                                                                     |  |       |  |                      |  |           |  |         |  |          |  |        |  |     |  |  |
|                      |                                                                                                              |                                                                                                                                                                                                                                                                                                                                                                                                                                                                                                                                                                                                                                     |                                                                                     |  |       |  |                      |  |           |  |         |  |          |  |        |  |     |  |  |
|                      |                                                                                                              |                                                                                                                                                                                                                                                                                                                                                                                                                                                                                                                                                                                                                                     |                                                                                     |  |       |  |                      |  |           |  |         |  |          |  |        |  |     |  |  |
| 7                    | Support for attending meetings and/or travel                                                                 | <input checked="" type="checkbox"/> <b>None</b><br><table border="1" style="width: 100%; border-collapse: collapse;"> <tr><td style="width: 50%; height: 20px;"></td><td style="width: 50%;"></td></tr> <tr><td style="height: 20px;"></td><td></td></tr> <tr><td style="height: 20px;"></td><td></td></tr> </table>                                                                                                                                                                                                                                                                                                                |                                                                                     |  |       |  |                      |  |           |  |         |  |          |  |        |  |     |  |  |
|                      |                                                                                                              |                                                                                                                                                                                                                                                                                                                                                                                                                                                                                                                                                                                                                                     |                                                                                     |  |       |  |                      |  |           |  |         |  |          |  |        |  |     |  |  |
|                      |                                                                                                              |                                                                                                                                                                                                                                                                                                                                                                                                                                                                                                                                                                                                                                     |                                                                                     |  |       |  |                      |  |           |  |         |  |          |  |        |  |     |  |  |
|                      |                                                                                                              |                                                                                                                                                                                                                                                                                                                                                                                                                                                                                                                                                                                                                                     |                                                                                     |  |       |  |                      |  |           |  |         |  |          |  |        |  |     |  |  |
| 8                    | Patents planned, issued or pending                                                                           | <input checked="" type="checkbox"/> <b>None</b><br><table border="1" style="width: 100%; border-collapse: collapse;"> <tr><td style="width: 50%; height: 20px;"></td><td style="width: 50%;"></td></tr> <tr><td style="height: 20px;"></td><td></td></tr> <tr><td style="height: 20px;"></td><td></td></tr> </table>                                                                                                                                                                                                                                                                                                                |                                                                                     |  |       |  |                      |  |           |  |         |  |          |  |        |  |     |  |  |
|                      |                                                                                                              |                                                                                                                                                                                                                                                                                                                                                                                                                                                                                                                                                                                                                                     |                                                                                     |  |       |  |                      |  |           |  |         |  |          |  |        |  |     |  |  |
|                      |                                                                                                              |                                                                                                                                                                                                                                                                                                                                                                                                                                                                                                                                                                                                                                     |                                                                                     |  |       |  |                      |  |           |  |         |  |          |  |        |  |     |  |  |
|                      |                                                                                                              |                                                                                                                                                                                                                                                                                                                                                                                                                                                                                                                                                                                                                                     |                                                                                     |  |       |  |                      |  |           |  |         |  |          |  |        |  |     |  |  |
| 9                    | Participation on a Data Safety Monitoring Board or Advisory Board                                            | <input checked="" type="checkbox"/> <b>None</b><br><table border="1" style="width: 100%; border-collapse: collapse;"> <tr><td style="width: 50%; height: 20px;"></td><td style="width: 50%;"></td></tr> <tr><td style="height: 20px;"></td><td></td></tr> <tr><td style="height: 20px;"></td><td></td></tr> </table>                                                                                                                                                                                                                                                                                                                |                                                                                     |  |       |  |                      |  |           |  |         |  |          |  |        |  |     |  |  |
|                      |                                                                                                              |                                                                                                                                                                                                                                                                                                                                                                                                                                                                                                                                                                                                                                     |                                                                                     |  |       |  |                      |  |           |  |         |  |          |  |        |  |     |  |  |
|                      |                                                                                                              |                                                                                                                                                                                                                                                                                                                                                                                                                                                                                                                                                                                                                                     |                                                                                     |  |       |  |                      |  |           |  |         |  |          |  |        |  |     |  |  |
|                      |                                                                                                              |                                                                                                                                                                                                                                                                                                                                                                                                                                                                                                                                                                                                                                     |                                                                                     |  |       |  |                      |  |           |  |         |  |          |  |        |  |     |  |  |
| 10                   | Leadership or fiduciary role in other board, society, committee or advocacy group, paid or unpaid            | <input checked="" type="checkbox"/> <b>None</b><br><table border="1" style="width: 100%; border-collapse: collapse;"> <tr><td style="width: 50%; height: 20px;"></td><td style="width: 50%;"></td></tr> <tr><td style="height: 20px;"></td><td></td></tr> <tr><td style="height: 20px;"></td><td></td></tr> </table>                                                                                                                                                                                                                                                                                                                |                                                                                     |  |       |  |                      |  |           |  |         |  |          |  |        |  |     |  |  |
|                      |                                                                                                              |                                                                                                                                                                                                                                                                                                                                                                                                                                                                                                                                                                                                                                     |                                                                                     |  |       |  |                      |  |           |  |         |  |          |  |        |  |     |  |  |
|                      |                                                                                                              |                                                                                                                                                                                                                                                                                                                                                                                                                                                                                                                                                                                                                                     |                                                                                     |  |       |  |                      |  |           |  |         |  |          |  |        |  |     |  |  |
|                      |                                                                                                              |                                                                                                                                                                                                                                                                                                                                                                                                                                                                                                                                                                                                                                     |                                                                                     |  |       |  |                      |  |           |  |         |  |          |  |        |  |     |  |  |

|           |                                                                                  | Name all entities with whom you have this relationship or indicate none (add rows as needed)                                                                                                                                                                                                                         | Specifications/Comments (e.g., if payments were made to you or to your institution) |  |  |  |  |  |  |
|-----------|----------------------------------------------------------------------------------|----------------------------------------------------------------------------------------------------------------------------------------------------------------------------------------------------------------------------------------------------------------------------------------------------------------------|-------------------------------------------------------------------------------------|--|--|--|--|--|--|
| <b>11</b> | Stock or stock options                                                           | <input checked="" type="checkbox"/> <b>None</b><br><table border="1" style="width: 100%; border-collapse: collapse;"> <tr><td style="width: 50%; height: 15px;"></td><td style="width: 50%;"></td></tr> <tr><td style="height: 15px;"></td><td></td></tr> <tr><td style="height: 15px;"></td><td></td></tr> </table> |                                                                                     |  |  |  |  |  |  |
|           |                                                                                  |                                                                                                                                                                                                                                                                                                                      |                                                                                     |  |  |  |  |  |  |
|           |                                                                                  |                                                                                                                                                                                                                                                                                                                      |                                                                                     |  |  |  |  |  |  |
|           |                                                                                  |                                                                                                                                                                                                                                                                                                                      |                                                                                     |  |  |  |  |  |  |
| <b>12</b> | Receipt of equipment, materials, drugs, medical writing, gifts or other services | <input checked="" type="checkbox"/> <b>None</b><br><table border="1" style="width: 100%; border-collapse: collapse;"> <tr><td style="width: 50%; height: 15px;"></td><td style="width: 50%;"></td></tr> <tr><td style="height: 15px;"></td><td></td></tr> <tr><td style="height: 15px;"></td><td></td></tr> </table> |                                                                                     |  |  |  |  |  |  |
|           |                                                                                  |                                                                                                                                                                                                                                                                                                                      |                                                                                     |  |  |  |  |  |  |
|           |                                                                                  |                                                                                                                                                                                                                                                                                                                      |                                                                                     |  |  |  |  |  |  |
|           |                                                                                  |                                                                                                                                                                                                                                                                                                                      |                                                                                     |  |  |  |  |  |  |
| <b>13</b> | Other financial or non-financial interests                                       | <input checked="" type="checkbox"/> <b>None</b><br><table border="1" style="width: 100%; border-collapse: collapse;"> <tr><td style="width: 50%; height: 15px;"></td><td style="width: 50%;"></td></tr> <tr><td style="height: 15px;"></td><td></td></tr> <tr><td style="height: 15px;"></td><td></td></tr> </table> |                                                                                     |  |  |  |  |  |  |
|           |                                                                                  |                                                                                                                                                                                                                                                                                                                      |                                                                                     |  |  |  |  |  |  |
|           |                                                                                  |                                                                                                                                                                                                                                                                                                                      |                                                                                     |  |  |  |  |  |  |
|           |                                                                                  |                                                                                                                                                                                                                                                                                                                      |                                                                                     |  |  |  |  |  |  |

**Please place an "X" next to the following statement to indicate your agreement:**

I certify that I have answered every question and have not altered the wording of any of the questions on this form.

# ICMJE DISCLOSURE FORM

**Date:** 7/18/2024

**Your Name:** Soumya D Chakravarty

**Manuscript Title:** Persistent Patient-Level Effect of Guselkumab at Consecutive 8-Week Dosing Visits and Over Time in Patients with Active Psoriatic Arthritis: Post hoc Analysis of a 2-year, Phase 3 Randomized, Controlled Study

**Manuscript Number (if known):** ACROR-24-063.R1

In the interest of transparency, we ask you to disclose all relationships/activities/interests listed below that are related to the content of your manuscript. "Related" means any relation with for-profit or not-for-profit third parties whose interests may be affected by the content of the manuscript. Disclosure represents a commitment to transparency and does not necessarily indicate a bias. If you are in doubt about whether to list a relationship/activity/interest, it is preferable that you do so.

The author's relationships/activities/interests should be defined broadly. For example, if your manuscript pertains to the epidemiology of hypertension, you should declare all relationships with manufacturers of antihypertensive medication, even if that medication is not mentioned in the manuscript.

In item #1 below, report all support for the work reported in this manuscript without time limit. For all other items, the time frame for disclosure is the past 36 months.

|                                                    | Name all entities with whom you have this relationship or indicate none (add rows as needed)                                                                                   | Specifications/Comments (e.g., if payments were made to you or to your institution)                                                                                                                                                                                                                                                                                                                                                                              |                                        |  |  |  |  |                                           |
|----------------------------------------------------|--------------------------------------------------------------------------------------------------------------------------------------------------------------------------------|------------------------------------------------------------------------------------------------------------------------------------------------------------------------------------------------------------------------------------------------------------------------------------------------------------------------------------------------------------------------------------------------------------------------------------------------------------------|----------------------------------------|--|--|--|--|-------------------------------------------|
| Time frame: Since the initial planning of the work |                                                                                                                                                                                |                                                                                                                                                                                                                                                                                                                                                                                                                                                                  |                                        |  |  |  |  |                                           |
| <b>1</b>                                           | All support for the present manuscript (e.g., funding, provision of study materials, medical writing, article processing charges, etc.)<br><b>No time limit for this item.</b> | <input type="checkbox"/> <b>None</b><br><table border="1" style="width: 100%; border-collapse: collapse; margin-top: 5px;"> <tr> <td style="width: 60%; padding: 2px;">Janssen Research and Development, LLC.</td> <td style="width: 40%;"></td> </tr> <tr> <td style="height: 15px;"></td> <td></td> </tr> <tr> <td style="height: 15px;"></td> <td style="text-align: center; font-size: small;">Click the tab key to add additional rows.</td> </tr> </table> | Janssen Research and Development, LLC. |  |  |  |  | Click the tab key to add additional rows. |
| Janssen Research and Development, LLC.             |                                                                                                                                                                                |                                                                                                                                                                                                                                                                                                                                                                                                                                                                  |                                        |  |  |  |  |                                           |
|                                                    |                                                                                                                                                                                |                                                                                                                                                                                                                                                                                                                                                                                                                                                                  |                                        |  |  |  |  |                                           |
|                                                    | Click the tab key to add additional rows.                                                                                                                                      |                                                                                                                                                                                                                                                                                                                                                                                                                                                                  |                                        |  |  |  |  |                                           |
| Time frame: past 36 months                         |                                                                                                                                                                                |                                                                                                                                                                                                                                                                                                                                                                                                                                                                  |                                        |  |  |  |  |                                           |
| <b>2</b>                                           | Grants or contracts from any entity (if not indicated in item #1 above).                                                                                                       | <input checked="" type="checkbox"/> <b>None</b><br><table border="1" style="width: 100%; border-collapse: collapse; margin-top: 5px;"> <tr> <td style="width: 60%; height: 15px;"></td> <td style="width: 40%;"></td> </tr> <tr> <td style="height: 15px;"></td> <td></td> </tr> <tr> <td style="height: 15px;"></td> <td></td> </tr> </table>                                                                                                                   |                                        |  |  |  |  |                                           |
|                                                    |                                                                                                                                                                                |                                                                                                                                                                                                                                                                                                                                                                                                                                                                  |                                        |  |  |  |  |                                           |
|                                                    |                                                                                                                                                                                |                                                                                                                                                                                                                                                                                                                                                                                                                                                                  |                                        |  |  |  |  |                                           |
|                                                    |                                                                                                                                                                                |                                                                                                                                                                                                                                                                                                                                                                                                                                                                  |                                        |  |  |  |  |                                           |
| <b>3</b>                                           | Royalties or licenses                                                                                                                                                          | <input checked="" type="checkbox"/> <b>None</b><br><table border="1" style="width: 100%; border-collapse: collapse; margin-top: 5px;"> <tr> <td style="width: 60%; height: 15px;"></td> <td style="width: 40%;"></td> </tr> <tr> <td style="height: 15px;"></td> <td></td> </tr> <tr> <td style="height: 15px;"></td> <td></td> </tr> </table>                                                                                                                   |                                        |  |  |  |  |                                           |
|                                                    |                                                                                                                                                                                |                                                                                                                                                                                                                                                                                                                                                                                                                                                                  |                                        |  |  |  |  |                                           |
|                                                    |                                                                                                                                                                                |                                                                                                                                                                                                                                                                                                                                                                                                                                                                  |                                        |  |  |  |  |                                           |
|                                                    |                                                                                                                                                                                |                                                                                                                                                                                                                                                                                                                                                                                                                                                                  |                                        |  |  |  |  |                                           |

|    |                                                                                                              | Name all entities with whom you have this relationship or indicate none (add rows as needed) | Specifications/Comments (e.g., if payments were made to you or to your institution) |
|----|--------------------------------------------------------------------------------------------------------------|----------------------------------------------------------------------------------------------|-------------------------------------------------------------------------------------|
| 4  | Consulting fees                                                                                              | <input checked="" type="checkbox"/> None                                                     |                                                                                     |
|    |                                                                                                              |                                                                                              |                                                                                     |
|    |                                                                                                              |                                                                                              |                                                                                     |
|    |                                                                                                              |                                                                                              |                                                                                     |
| 5  | Payment or honoraria for lectures, presentations, speakers bureaus, manuscript writing or educational events | <input checked="" type="checkbox"/> None                                                     |                                                                                     |
|    |                                                                                                              |                                                                                              |                                                                                     |
|    |                                                                                                              |                                                                                              |                                                                                     |
|    |                                                                                                              |                                                                                              |                                                                                     |
| 6  | Payment for expert testimony                                                                                 | <input checked="" type="checkbox"/> None                                                     |                                                                                     |
|    |                                                                                                              |                                                                                              |                                                                                     |
|    |                                                                                                              |                                                                                              |                                                                                     |
|    |                                                                                                              |                                                                                              |                                                                                     |
| 7  | Support for attending meetings and/or travel                                                                 | <input checked="" type="checkbox"/> None                                                     |                                                                                     |
|    |                                                                                                              |                                                                                              |                                                                                     |
|    |                                                                                                              |                                                                                              |                                                                                     |
|    |                                                                                                              |                                                                                              |                                                                                     |
| 8  | Patents planned, issued or pending                                                                           | <input checked="" type="checkbox"/> None                                                     |                                                                                     |
|    |                                                                                                              |                                                                                              |                                                                                     |
|    |                                                                                                              |                                                                                              |                                                                                     |
|    |                                                                                                              |                                                                                              |                                                                                     |
| 9  | Participation on a Data Safety Monitoring Board or Advisory Board                                            | <input checked="" type="checkbox"/> None                                                     |                                                                                     |
|    |                                                                                                              |                                                                                              |                                                                                     |
|    |                                                                                                              |                                                                                              |                                                                                     |
|    |                                                                                                              |                                                                                              |                                                                                     |
| 10 | Leadership or fiduciary role in other board, society, committee or advocacy group, paid or unpaid            | <input checked="" type="checkbox"/> None                                                     |                                                                                     |
|    |                                                                                                              |                                                                                              |                                                                                     |
|    |                                                                                                              |                                                                                              |                                                                                     |
|    |                                                                                                              |                                                                                              |                                                                                     |



|    |                                                                                  | Name all entities with whom you have this relationship or indicate none (add rows as needed) | Specifications/Comments (e.g., if payments were made to you or to your institution) |
|----|----------------------------------------------------------------------------------|----------------------------------------------------------------------------------------------|-------------------------------------------------------------------------------------|
| 11 | Stock or stock options                                                           | <input type="checkbox"/> None                                                                |                                                                                     |
|    |                                                                                  | Johnson & Johnson                                                                            | Dated 29May2024                                                                     |
|    |                                                                                  |                                                                                              |                                                                                     |
|    |                                                                                  |                                                                                              |                                                                                     |
| 12 | Receipt of equipment, materials, drugs, medical writing, gifts or other services | <input checked="" type="checkbox"/> None                                                     |                                                                                     |
|    |                                                                                  |                                                                                              |                                                                                     |
|    |                                                                                  |                                                                                              |                                                                                     |
|    |                                                                                  |                                                                                              |                                                                                     |
| 13 | Other financial or non-financial interests                                       | <input checked="" type="checkbox"/> None                                                     |                                                                                     |
|    |                                                                                  |                                                                                              |                                                                                     |
|    |                                                                                  |                                                                                              |                                                                                     |
|    |                                                                                  |                                                                                              |                                                                                     |

Please place an "X" next to the following statement to indicate your agreement:

I certify that I have answered every question and have not altered the wording of any of the questions on this form.

## ICMJE DISCLOSURE FORM

**Date:** 7/18/2024

**Your Name:** Xenofon Baraliakos

**Manuscript Title:** Persistent Patient-Level Effect of Guselkumab at Consecutive 8-Week Dosing Visits and Over Time in Patients with Active Psoriatic Arthritis: Post hoc Analysis of a 2-year, Phase 3 Randomized, Controlled Study

**Manuscript Number (if known):** ACROR-24-063.R1

In the interest of transparency, we ask you to disclose all relationships/activities/interests listed below that are related to the content of your manuscript. "Related" means any relation with for-profit or not-for-profit third parties whose interests may be affected by the content of the manuscript. Disclosure represents a commitment to transparency and does not necessarily indicate a bias. If you are in doubt about whether to list a relationship/activity/interest, it is preferable that you do so.

The author's relationships/activities/interests should be defined broadly. For example, if your manuscript pertains to the epidemiology of hypertension, you should declare all relationships with manufacturers of antihypertensive medication, even if that medication is not mentioned in the manuscript.

In item #1 below, report all support for the work reported in this manuscript without time limit. For all other items, the time frame for disclosure is the past 36 months.

|                                                    | Name all entities with whom you have this relationship or indicate none (add rows as needed)                                                                                   | Specifications/Comments (e.g., if payments were made to you or to your institution)                                                                                                                                                                                                                                                                                                                       |                                        |  |           |  |         |                                           |     |  |          |  |
|----------------------------------------------------|--------------------------------------------------------------------------------------------------------------------------------------------------------------------------------|-----------------------------------------------------------------------------------------------------------------------------------------------------------------------------------------------------------------------------------------------------------------------------------------------------------------------------------------------------------------------------------------------------------|----------------------------------------|--|-----------|--|---------|-------------------------------------------|-----|--|----------|--|
| Time frame: Since the initial planning of the work |                                                                                                                                                                                |                                                                                                                                                                                                                                                                                                                                                                                                           |                                        |  |           |  |         |                                           |     |  |          |  |
| <b>1</b>                                           | All support for the present manuscript (e.g., funding, provision of study materials, medical writing, article processing charges, etc.)<br><b>No time limit for this item.</b> | <input type="checkbox"/> <b>None</b><br><table border="1" style="width: 100%; border-collapse: collapse; margin-top: 5px;"> <tr> <td style="width: 80%;">Janssen Research and Development, LLC.</td> <td style="width: 20%;"></td> </tr> <tr> <td> </td> <td> </td> </tr> <tr> <td> </td> <td style="text-align: center; font-size: small;">Click the tab key to add additional rows.</td> </tr> </table> | Janssen Research and Development, LLC. |  |           |  |         | Click the tab key to add additional rows. |     |  |          |  |
| Janssen Research and Development, LLC.             |                                                                                                                                                                                |                                                                                                                                                                                                                                                                                                                                                                                                           |                                        |  |           |  |         |                                           |     |  |          |  |
|                                                    |                                                                                                                                                                                |                                                                                                                                                                                                                                                                                                                                                                                                           |                                        |  |           |  |         |                                           |     |  |          |  |
|                                                    | Click the tab key to add additional rows.                                                                                                                                      |                                                                                                                                                                                                                                                                                                                                                                                                           |                                        |  |           |  |         |                                           |     |  |          |  |
| Time frame: past 36 months                         |                                                                                                                                                                                |                                                                                                                                                                                                                                                                                                                                                                                                           |                                        |  |           |  |         |                                           |     |  |          |  |
| <b>2</b>                                           | Grants or contracts from any entity (if not indicated in item #1 above).                                                                                                       | <input type="checkbox"/> <b>None</b><br><table border="1" style="width: 100%; border-collapse: collapse; margin-top: 5px;"> <tr> <td style="width: 80%;">AbbVie</td> <td style="width: 20%;"></td> </tr> <tr> <td>Eli Lilly</td> <td> </td> </tr> <tr> <td>Janssen</td> <td> </td> </tr> <tr> <td>MSD</td> <td> </td> </tr> <tr> <td>Novartis</td> <td> </td> </tr> </table>                              | AbbVie                                 |  | Eli Lilly |  | Janssen |                                           | MSD |  | Novartis |  |
| AbbVie                                             |                                                                                                                                                                                |                                                                                                                                                                                                                                                                                                                                                                                                           |                                        |  |           |  |         |                                           |     |  |          |  |
| Eli Lilly                                          |                                                                                                                                                                                |                                                                                                                                                                                                                                                                                                                                                                                                           |                                        |  |           |  |         |                                           |     |  |          |  |
| Janssen                                            |                                                                                                                                                                                |                                                                                                                                                                                                                                                                                                                                                                                                           |                                        |  |           |  |         |                                           |     |  |          |  |
| MSD                                                |                                                                                                                                                                                |                                                                                                                                                                                                                                                                                                                                                                                                           |                                        |  |           |  |         |                                           |     |  |          |  |
| Novartis                                           |                                                                                                                                                                                |                                                                                                                                                                                                                                                                                                                                                                                                           |                                        |  |           |  |         |                                           |     |  |          |  |
| <b>3</b>                                           | Royalties or licenses                                                                                                                                                          | <input checked="" type="checkbox"/> <b>None</b><br><table border="1" style="width: 100%; border-collapse: collapse; margin-top: 5px;"> <tr> <td style="width: 80%;"> </td> <td style="width: 20%;"> </td> </tr> <tr> <td> </td> <td> </td> </tr> <tr> <td> </td> <td> </td> </tr> </table>                                                                                                                |                                        |  |           |  |         |                                           |     |  |          |  |
|                                                    |                                                                                                                                                                                |                                                                                                                                                                                                                                                                                                                                                                                                           |                                        |  |           |  |         |                                           |     |  |          |  |
|                                                    |                                                                                                                                                                                |                                                                                                                                                                                                                                                                                                                                                                                                           |                                        |  |           |  |         |                                           |     |  |          |  |
|                                                    |                                                                                                                                                                                |                                                                                                                                                                                                                                                                                                                                                                                                           |                                        |  |           |  |         |                                           |     |  |          |  |

|    |                                                                                                              | Name all entities with whom you have this relationship or indicate none (add rows as needed) | Specifications/Comments (e.g., if payments were made to you or to your institution) |
|----|--------------------------------------------------------------------------------------------------------------|----------------------------------------------------------------------------------------------|-------------------------------------------------------------------------------------|
| 4  | Consulting fees                                                                                              | <input type="checkbox"/> None                                                                |                                                                                     |
|    |                                                                                                              | AbbVie                                                                                       |                                                                                     |
|    |                                                                                                              | Chugai                                                                                       |                                                                                     |
|    |                                                                                                              | Eli Lilly                                                                                    |                                                                                     |
|    |                                                                                                              | Janssen                                                                                      |                                                                                     |
|    |                                                                                                              | MSD                                                                                          |                                                                                     |
|    |                                                                                                              | Novartis                                                                                     |                                                                                     |
|    |                                                                                                              | Pfizer                                                                                       |                                                                                     |
|    |                                                                                                              | Roche                                                                                        |                                                                                     |
|    |                                                                                                              | UCB                                                                                          |                                                                                     |
| 5  | Payment or honoraria for lectures, presentations, speakers bureaus, manuscript writing or educational events | <input type="checkbox"/> None                                                                |                                                                                     |
|    |                                                                                                              | AbbVie                                                                                       |                                                                                     |
|    |                                                                                                              | Chugai                                                                                       |                                                                                     |
|    |                                                                                                              | Eli Lilly                                                                                    |                                                                                     |
|    |                                                                                                              | Janssen                                                                                      |                                                                                     |
|    |                                                                                                              | MSD                                                                                          |                                                                                     |
|    |                                                                                                              | Novartis                                                                                     |                                                                                     |
|    |                                                                                                              | Pfizer                                                                                       |                                                                                     |
|    |                                                                                                              | Roche                                                                                        |                                                                                     |
|    |                                                                                                              | UCB                                                                                          |                                                                                     |
| 6  | Payment for expert testimony                                                                                 | <input checked="" type="checkbox"/> None                                                     |                                                                                     |
|    |                                                                                                              |                                                                                              |                                                                                     |
|    |                                                                                                              |                                                                                              |                                                                                     |
|    |                                                                                                              |                                                                                              |                                                                                     |
| 7  | Support for attending meetings and/or travel                                                                 | <input checked="" type="checkbox"/> None                                                     |                                                                                     |
|    |                                                                                                              |                                                                                              |                                                                                     |
|    |                                                                                                              |                                                                                              |                                                                                     |
|    |                                                                                                              |                                                                                              |                                                                                     |
| 8  | Patents planned, issued or pending                                                                           | <input checked="" type="checkbox"/> None                                                     |                                                                                     |
|    |                                                                                                              |                                                                                              |                                                                                     |
|    |                                                                                                              |                                                                                              |                                                                                     |
|    |                                                                                                              |                                                                                              |                                                                                     |
| 9  | Participation on a Data Safety Monitoring Board or Advisory Board                                            | <input checked="" type="checkbox"/> None                                                     |                                                                                     |
|    |                                                                                                              |                                                                                              |                                                                                     |
|    |                                                                                                              |                                                                                              |                                                                                     |
|    |                                                                                                              |                                                                                              |                                                                                     |
| 10 | Leadership or fiduciary role in other board, society,                                                        | <input checked="" type="checkbox"/> None                                                     |                                                                                     |
|    |                                                                                                              |                                                                                              |                                                                                     |
|    |                                                                                                              |                                                                                              |                                                                                     |

|           |                                                                                  | Name all entities with whom you have this relationship or indicate none (add rows as needed) | Specifications/Comments (e.g., if payments were made to you or to your institution) |
|-----------|----------------------------------------------------------------------------------|----------------------------------------------------------------------------------------------|-------------------------------------------------------------------------------------|
|           | committee or advocacy group, paid or unpaid                                      |                                                                                              |                                                                                     |
| <b>11</b> | Stock or stock options                                                           | <input checked="" type="checkbox"/> <b>None</b>                                              |                                                                                     |
|           |                                                                                  |                                                                                              |                                                                                     |
|           |                                                                                  |                                                                                              |                                                                                     |
| <b>12</b> | Receipt of equipment, materials, drugs, medical writing, gifts or other services | <input checked="" type="checkbox"/> <b>None</b>                                              |                                                                                     |
|           |                                                                                  |                                                                                              |                                                                                     |
|           |                                                                                  |                                                                                              |                                                                                     |
| <b>13</b> | Other financial or non-financial interests                                       | <input checked="" type="checkbox"/> <b>None</b>                                              |                                                                                     |
|           |                                                                                  |                                                                                              |                                                                                     |
|           |                                                                                  |                                                                                              |                                                                                     |

Please place an "X" next to the following statement to indicate your agreement:

I certify that I have answered every question and have not altered the wording of any of the questions on this form.
